# Supplementary material for: On the localization of the cleavage site in human alpha‐2‐antiplasmin, involved in the generation of the non‐plasminogen binding form
Source: PubMed Central journal article supplement — J Thromb Haemost. 2020 Mar 5;18(5):1162–70. doi: 10.1111/jth.14761 (PMC7317795; doi:10.1111/jth.14761), 2020-03-05
Supplement: JTH-18-1162-s001.pdf [file JTH-18-1162-s001.pdf]

**Supporting information of S. Abdul *et al*: On the localization of the cleavage site in human alpha-2-antiplasmin, involved in the generation of the non-plasminogen binding form.**

**Table S1.** Inclusion list of 26 m/z peptide masses favored for MS2 fragmentation by HCD and EThcD.

| <i>Sequence</i>         | <i>Amino acids</i> | <i>z</i> | <i>MC</i> | <i>m/z</i> |
|-------------------------|--------------------|----------|-----------|------------|
| R.ELKEQQ.D              | 416-421            | 2        | 0         | 387.7032   |
| R.ELKEQQ.D*             | 416-421            | 2        | 0         | 388.1952   |
| R.ELKEQQ.D**            | 416-421            | 2        | 0         | 388.6872   |
| R.ELKEQQD.S             | 416-422            | 2        | 0         | 445.2167   |
| R.ELKEQQD.S*            | 416-422            | 2        | 0         | 445.7087   |
| R.ELKEQQD.S**           | 416-422            | 2        | 0         | 446.2007   |
| R.NPNPSAPRELKEQQ.D      | 408-421            | 2        | 1         | 804.4104   |
| R.NPNPSAPRELKEQQ.D*     | 408-421            | 2        | 1         | 804.9024   |
| R.NPNPSAPRELKEQQ.D**    | 408-421            | 2        | 1         | 805.3944   |
| R.NPNPSAPRELKEQQ.D***   | 408-421            | 2        | 1         | 805.8864   |
| R.NPNPSAPRELKEQQ.D****  | 408-421            | 2        | 1         | 806.3784   |
| R.NPNPSAPRELKEQQ.D      | 408-421            | 3        | 1         | 536.6094   |
| R.NPNPSAPRELKEQQ.D*     | 408-421            | 3        | 1         | 536.9374   |
| R.NPNPSAPRELKEQQ.D**    | 408-421            | 3        | 1         | 537.2654   |
| R.NPNPSAPRELKEQQ.D***   | 408-421            | 3        | 1         | 537.5934   |
| R.NPNPSAPRELKEQQ.D****  | 408-421            | 3        | 1         | 537.9214   |
| R.NPNPSAPRELKEQQD.S     | 408-422            | 2        | 1         | 861.9239   |
| R.NPNPSAPRELKEQQD.S*    | 408-422            | 2        | 1         | 862.4159   |
| R.NPNPSAPRELKEQQD.S**   | 408-422            | 2        | 1         | 862.9079   |
| R.NPNPSAPRELKEQQD.S***  | 408-422            | 2        | 1         | 863.3999   |
| R.NPNPSAPRELKEQQD.S**** | 408-422            | 2        | 1         | 863.8919   |
| R.NPNPSAPRELKEQQD.S     | 408-422            | 3        | 1         | 574.9517   |

|                         |         |   |   |          |
|-------------------------|---------|---|---|----------|
| R.NPNPSAPRELKEQQD.S*    | 408-422 | 3 | 1 | 575.2797 |
| R.NPNPSAPRELKEQQD.S**   | 408-422 | 3 | 1 | 575.6077 |
| R.NPNPSAPRELKEQQD.S***  | 408-422 | 3 | 1 | 575.9357 |
| R.NPNPSAPRELKEQQD.S**** | 408-422 | 3 | 1 | 576.2637 |

z: charge state of peptide, MC: number of miscleavages, m/z: the observed mass/charge. The number of deamidations are indicated by the asterisks.

Supplementary figures

Score: 35

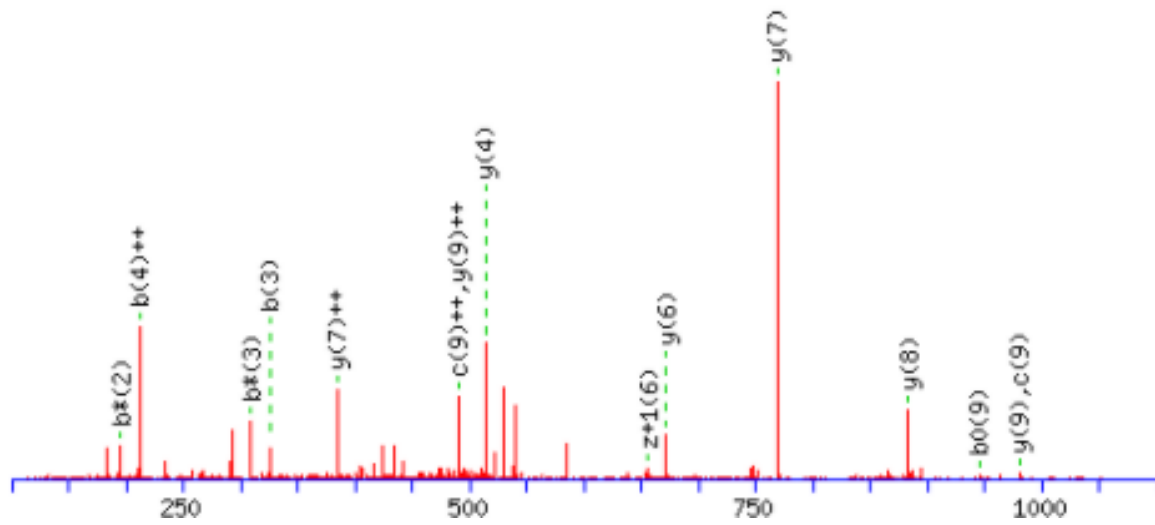

| #  | b               | b <sup>++</sup> | b <sup>*</sup>  | b <sup>+++</sup> | b <sup>0</sup>  | b <sup>0++</sup> | c               | c <sup>++</sup> | Seq. | w        | y               | y <sup>++</sup> | y <sup>*</sup> | y <sup>+++</sup> | y <sup>0</sup> | y <sup>0++</sup> | z+1             | z+1 <sup>++</sup> | z+2      | z+2 <sup>++</sup> | #        |    |
|----|-----------------|-----------------|-----------------|------------------|-----------------|------------------|-----------------|-----------------|------|----------|-----------------|-----------------|----------------|------------------|----------------|------------------|-----------------|-------------------|----------|-------------------|----------|----|
| 1  | 115.0502        | 58.0287         | 98.0237         | 49.5155          |                 |                  | 132.0768        | 66.5420         | N    |          |                 |                 |                |                  |                |                  |                 |                   |          |                   |          | 10 |
| 2  | <b>212.1030</b> | 106.5551        | <b>195.0764</b> | 98.0418          |                 |                  | 229.1295        | 115.0684        | P    | 937.4738 | <b>980.5160</b> | <b>490.7616</b> | 963.4894       | 482.2483         | 962.5054       | 481.7563         | 964.4972        | 482.7523          | 965.5051 | 483.2562          | 966.5149 | 9  |
| 3  | <b>326.1459</b> | 163.5766        | <b>309.1193</b> | 155.0633         |                 |                  | 343.1724        | 172.0899        | N    | 823.4308 | <b>883.4632</b> | 442.2352        | 866.4367       | 433.7220         | 865.4526       | 433.2300         | 867.4445        | 434.2259          | 868.4523 | 434.7298          | 869.4377 | 8  |
| 4  | 423.1987        | <b>212.1030</b> | 406.1721        | 203.5897         |                 |                  | 440.2252        | 220.6162        | P    | 726.3781 | <b>769.4203</b> | <b>385.2138</b> | 752.3937       | 376.7005         | 751.4097       | 376.2085         | 753.4016        | 377.2044          | 754.4094 | 377.7083          | 755.4171 | 7  |
| 5  | 510.2307        | 255.6190        | 493.2041        | 247.1057         | 492.2201        | 246.6137         | 527.2572        | 264.1323        | S    | 639.3461 | <b>672.3675</b> | 336.6874        | 655.3410       | 328.1741         | 654.3570       | 327.6821         | <b>656.3488</b> | 328.6780          | 657.3566 | 329.1819          | 658.3653 | 6  |
| 6  | 581.2678        | 291.1375        | 564.2413        | 282.6243         | 563.2572        | 282.1323         | 598.2943        | 299.6508        | A    |          | 585.3355        | 293.1714        | 568.3089       | 284.6581         | 567.3249       | 284.1661         | 569.3168        | 285.1620          | 570.3246 | 285.6659          | 571.3325 | 5  |
| 7  | 678.3206        | 339.6639        | 661.2940        | 331.1506         | 660.3100        | 330.6586         | 695.3471        | 348.1772        | P    | 471.2562 | <b>514.2984</b> | 257.6528        | 497.2718       | 249.1396         | 496.2878       | 248.6475         | 498.2796        | 249.6435          | 499.2875 | 250.1474          | 499.6453 | 4  |
| 8  | 834.4217        | 417.7145        | 817.3951        | 409.2012         | 816.4111        | 408.7092         | 851.4482        | 426.2278        | R    | 315.1551 | 417.2456        | 209.1264        | 400.2191       | 200.6132         | 399.2350       | 200.1212         | 401.2269        | 201.1171          | 402.2347 | 201.6210          | 402.6268 | 3  |
| 9  | 963.4643        | 482.2358        | 946.4377        | 473.7225         | <b>945.4537</b> | 473.2305         | <b>980.4908</b> | <b>490.7490</b> | E    |          | 261.1445        | 131.0759        |                | 243.1339         | 122.0706       | 245.1258         | 123.0665        | 246.1336          | 123.5704 | 247.1411          | 123.6283 | 2  |
| 10 |                 |                 |                 |                  |                 |                  |                 |                 | L    |          | 132.1019        | 66.5546         |                |                  |                |                  | 116.0832        | 58.5452           | 117.0910 | 59.0491           | 118.1069 | 1  |

**Fig. S1.** MS/MS fragmentation spectra of the Asn408-Leu417 peptide in an overnight Arg-C digest of NPB- $\alpha$ 2AP as determined by Mascot analysis. Best spectrum data is shown.

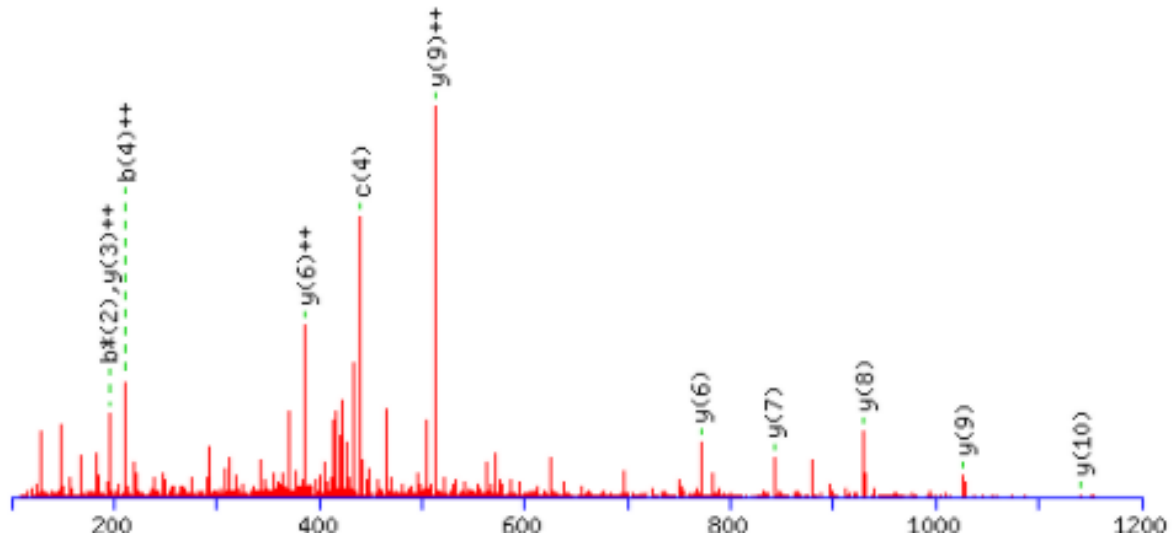

| #  | b         | b <sup>++</sup> | b*        | b <sup>+++</sup> | b <sup>0</sup> | b <sup>0++</sup> | c         | c <sup>++</sup> | Seq. | w         | y         | y <sup>++</sup> | y*        | y <sup>+++</sup> | y <sup>0</sup> | y <sup>0++</sup> | z+1       | z+1 <sup>++</sup> | z+2       | z+2 <sup>++</sup> | #  |
|----|-----------|-----------------|-----------|------------------|----------------|------------------|-----------|-----------------|------|-----------|-----------|-----------------|-----------|------------------|----------------|------------------|-----------|-------------------|-----------|-------------------|----|
| 1  | 115.0502  | 58.0287         | 98.0237   | 49.5155          |                |                  | 132.0768  | 66.5420         | N    |           |           |                 |           |                  |                |                  |           |                   |           |                   | 12 |
| 2  | 212.1030  | 106.5551        | 195.0764  | 98.0418          |                |                  | 229.1295  | 115.0684        | P    | 1194.6113 | 1237.6535 | 619.3304        | 1220.6270 | 610.8171         | 1219.6430      | 610.3251         | 1221.6348 | 611.3210          | 1222.6426 | 611.8250          | 11 |
| 3  | 326.1459  | 163.5766        | 309.1193  | 155.0633         |                |                  | 343.1724  | 172.0899        | N    | 1080.5684 | 1140.6008 | 570.8040        | 1123.5742 | 562.2907         | 1122.5902      | 561.7987         | 1124.5820 | 562.7947          | 1125.5899 | 563.2986          | 10 |
| 4  | 423.1987  | 212.1030        | 406.1721  | 203.5897         |                |                  | 440.2252  | 220.6162        | P    | 983.5156  | 1026.5578 | 513.7826        | 1009.5313 | 505.2693         | 1008.5473      | 504.7773         | 1010.5391 | 505.7732          | 1011.5469 | 506.2771          | 9  |
| 5  | 510.2307  | 255.6190        | 493.2041  | 247.1057         | 492.2201       | 246.6137         | 527.2572  | 264.1323        | S    | 896.4836  | 929.5051  | 465.2562        | 912.4785  | 456.7429         | 911.4945       | 456.2509         | 913.4863  | 457.2468          | 914.4942  | 457.7507          | 8  |
| 6  | 581.2678  | 291.1375        | 564.2413  | 282.6243         | 563.2572       | 282.1323         | 598.2943  | 299.6508        | A    |           | 842.4730  | 421.7402        | 825.4465  | 413.2269         | 824.4625       | 412.7349         | 826.4543  | 413.7308          | 827.4621  | 414.2347          | 7  |
| 7  | 678.3206  | 339.6639        | 661.2940  | 331.1506         | 660.3100       | 330.6586         | 695.3471  | 348.1772        | P    | 728.3937  | 771.4359  | 386.2216        | 754.4094  | 377.7083         | 753.4254       | 377.2163         | 755.4172  | 378.2122          | 756.4250  | 378.7162          | 6  |
| 8  | 834.4217  | 417.7145        | 817.3951  | 409.2012         | 816.4111       | 408.7092         | 851.4482  | 426.2278        | R    | 572.2926  | 674.3832  | 337.6952        | 657.3566  | 329.1819         | 656.3726       | 328.6899         | 658.3644  | 329.6859          | 659.3723  | 330.1898          | 5  |
| 9  | 963.4643  | 482.2358        | 946.4377  | 473.7225         | 945.4537       | 473.2305         | 980.4908  | 490.7490        | E    |           | 518.2821  | 259.6447        | 501.2555  | 251.1314         | 500.2715       | 250.6394         | 502.2633  | 251.6353          | 503.2712  | 252.1392          | 4  |
| 10 | 1076.5483 | 538.7778        | 1059.5218 | 530.2645         | 1058.5378      | 529.7725         | 1093.5749 | 547.2911        | L    |           | 389.2395  | 195.1234        | 372.2129  | 186.6101         | 371.2289       | 186.1181         | 373.2207  | 187.1140          | 374.2286  | 187.6179          | 3  |
| 11 | 1204.6433 | 602.8253        | 1187.6167 | 594.3120         | 1186.6327      | 593.8200         | 1221.6698 | 611.3386        | K    |           | 276.1554  | 138.5813        | 259.1288  | 130.0681         | 258.1448       | 129.5761         | 260.1367  | 130.5720          | 261.1445  | 131.0759          | 2  |
| 12 |           |                 |           |                  |                |                  |           |                 | E    |           | 148.0604  | 74.5339         |           |                  | 130.0499       | 65.5286          | 132.0417  | 66.5245           | 133.0495  | 67.0284           | 1  |

**Fig. S2.** MS/MS fragmentation spectra of the Asn408-Glu419 peptide in an overnight Arg-C digest of NPB- $\alpha$ 2AP as determined by Mascot analysis. Best spectrum data is shown.

A

Score: 58

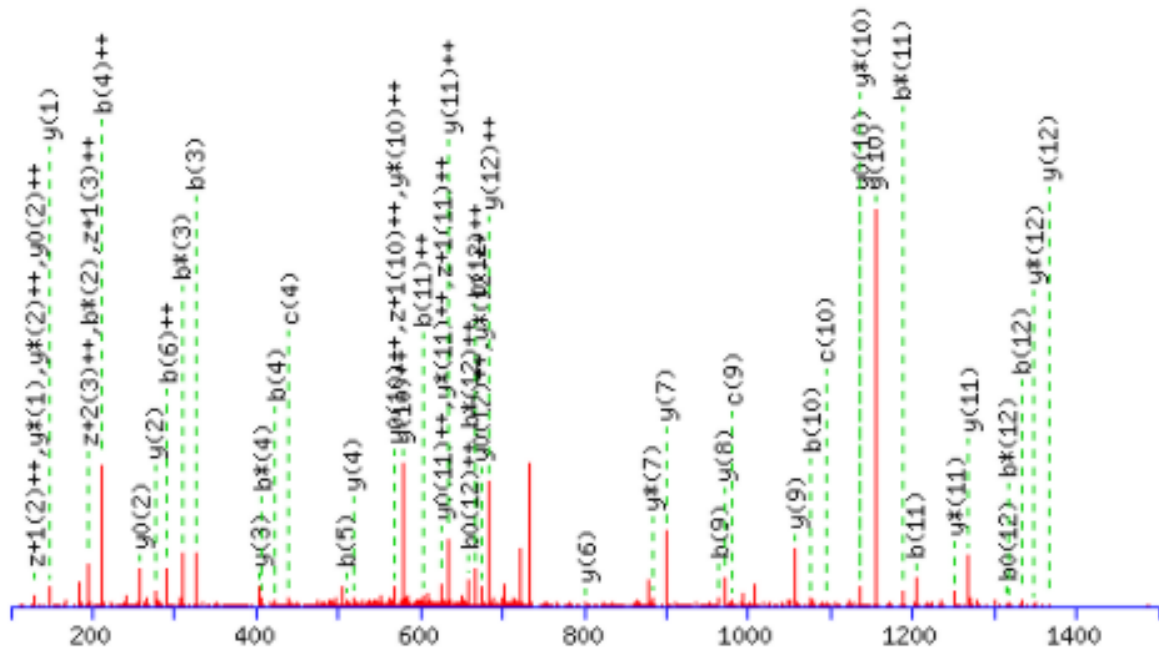

| #  | b                | b <sup>++</sup> | b <sup>*</sup>   | b <sup>+++</sup> | b <sup>0</sup>   | b <sup>0++</sup> | c                | c <sup>++</sup> | Seq. | w         | y                | y <sup>++</sup> | y <sup>*</sup>   | y <sup>+++</sup> | y <sup>0</sup>   | y <sup>0++</sup> | z+1       | z+1 <sup>++</sup> | z+2       | z+2 <sup>++</sup> | # |    |
|----|------------------|-----------------|------------------|------------------|------------------|------------------|------------------|-----------------|------|-----------|------------------|-----------------|------------------|------------------|------------------|------------------|-----------|-------------------|-----------|-------------------|---|----|
| 1  | 115.0502         | 58.0287         | 98.0237          | 49.5155          |                  |                  | 132.0768         | 66.5420         | N    |           |                  |                 |                  |                  |                  |                  |           |                   |           |                   |   | 13 |
| 2  | <b>212.1030</b>  | 106.5551        | <b>195.0764</b>  | 98.0418          |                  |                  | 229.1295         | 115.0684        | P    | 1322.6699 | <b>1365.7121</b> | <b>683.3597</b> | <b>1348.6856</b> | <b>674.8464</b>  | 1347.7015        | <b>674.3544</b>  | 1349.6934 | 675.3503          | 1350.7012 | 675.8542          |   | 12 |
| 3  | <b>326.1459</b>  | 163.5766        | <b>309.1193</b>  | 155.0633         |                  |                  | 343.1724         | 172.0899        | N    | 1208.6270 | <b>1268.6593</b> | <b>634.8333</b> | <b>1251.6328</b> | <b>626.3200</b>  | 1250.6488        | <b>625.8280</b>  | 1252.6406 | <b>626.8239</b>   | 1253.6484 | 627.3279          |   | 11 |
| 4  | <b>423.1987</b>  | <b>212.1030</b> | <b>406.1721</b>  | 203.5897         |                  |                  | <b>440.2252</b>  | 220.6162        | P    | 1111.5742 | <b>1154.6164</b> | <b>577.8118</b> | <b>1137.5899</b> | <b>569.2986</b>  | <b>1136.6058</b> | <b>568.8066</b>  | 1138.5977 | <b>569.8025</b>   | 1139.6055 | 570.3064          |   | 10 |
| 5  | <b>510.2307</b>  | 255.6190        | 493.2041         | 247.1057         | 492.2201         | 246.6137         | 527.2572         | 264.1323        | S    | 1024.5422 | <b>1057.5636</b> | 529.2855        | 1040.5371        | 520.7722         | 1039.5531        | 520.2802         | 1041.5449 | 521.2761          | 1042.5528 | 521.7800          |   | 9  |
| 6  | 581.2678         | <b>291.1375</b> | 564.2413         | 282.6243         | 563.2572         | 282.1323         | 598.2943         | 299.6508        | A    |           | <b>970.5316</b>  | 485.7694        | 953.5051         | 477.2562         | 952.5211         | 476.7642         | 954.5129  | 477.7601          | 955.5207  | 478.2640          |   | 8  |
| 7  | 678.3206         | 339.6639        | 661.2940         | 331.1506         | 660.3100         | 330.6586         | 695.3471         | 348.1772        | P    | 856.4523  | <b>899.4945</b>  | 450.2509        | <b>882.4680</b>  | 441.7376         | 881.4839         | 441.2456         | 883.4758  | 442.2415          | 884.4836  | 442.7454          |   | 7  |
| 8  | 834.4217         | 417.7145        | 817.3951         | 409.2012         | 816.4111         | 408.7092         | 851.4482         | 426.2278        | R    | 700.3512  | <b>802.4417</b>  | 401.7245        | 785.4152         | 393.2112         | 784.4312         | 392.7192         | 786.4230  | 393.7151          | 787.4308  | 394.2191          |   | 6  |
| 9  | <b>963.4643</b>  | 482.2358        | 946.4377         | 473.7225         | 945.4537         | 473.2305         | <b>980.4908</b>  | 490.7490        | E    |           | 646.3406         | 323.6740        | 629.3141         | 315.1607         | 628.3301         | 314.6687         | 630.3219  | 315.6646          | 631.3297  | 316.1685          |   | 5  |
| 10 | <b>1076.5483</b> | 538.7778        | 1059.5218        | 530.2645         | 1058.5378        | 529.7725         | <b>1093.5749</b> | 547.2911        | L    |           | <b>517.2980</b>  | 259.1527        | 500.2715         | 250.6394         | 499.2875         | 250.1474         | 501.2793  | 251.1433          | 502.2871  | 251.6472          |   | 4  |
| 11 | <b>1204.6433</b> | <b>602.8253</b> | <b>1187.6167</b> | 594.3120         | 1186.6327        | 593.8200         | 1221.6698        | 611.3386        | K    |           | <b>404.2140</b>  | 202.6106        | 387.1874         | 194.0974         | 386.2034         | 193.6053         | 388.1953  | <b>194.6013</b>   | 389.2031  | <b>195.1052</b>   |   | 3  |
| 12 | <b>1333.6859</b> | <b>667.3466</b> | <b>1316.6593</b> | <b>658.8333</b>  | <b>1315.6753</b> | <b>658.3413</b>  | 1350.7124        | 675.8599        | E    |           | <b>276.1190</b>  | 138.5631        | 259.0925         | <b>130.0499</b>  | <b>258.1084</b>  | <b>129.5579</b>  | 260.1003  | <b>130.5538</b>   | 261.1081  | 131.0577          |   | 2  |
| 13 |                  |                 |                  |                  |                  |                  |                  |                 | Q    |           | <b>147.0764</b>  | 74.0418         | <b>130.0499</b>  | 65.5286          |                  |                  | 131.0577  | 66.0325           | 132.0655  | 66.5364           |   | 1  |

**B**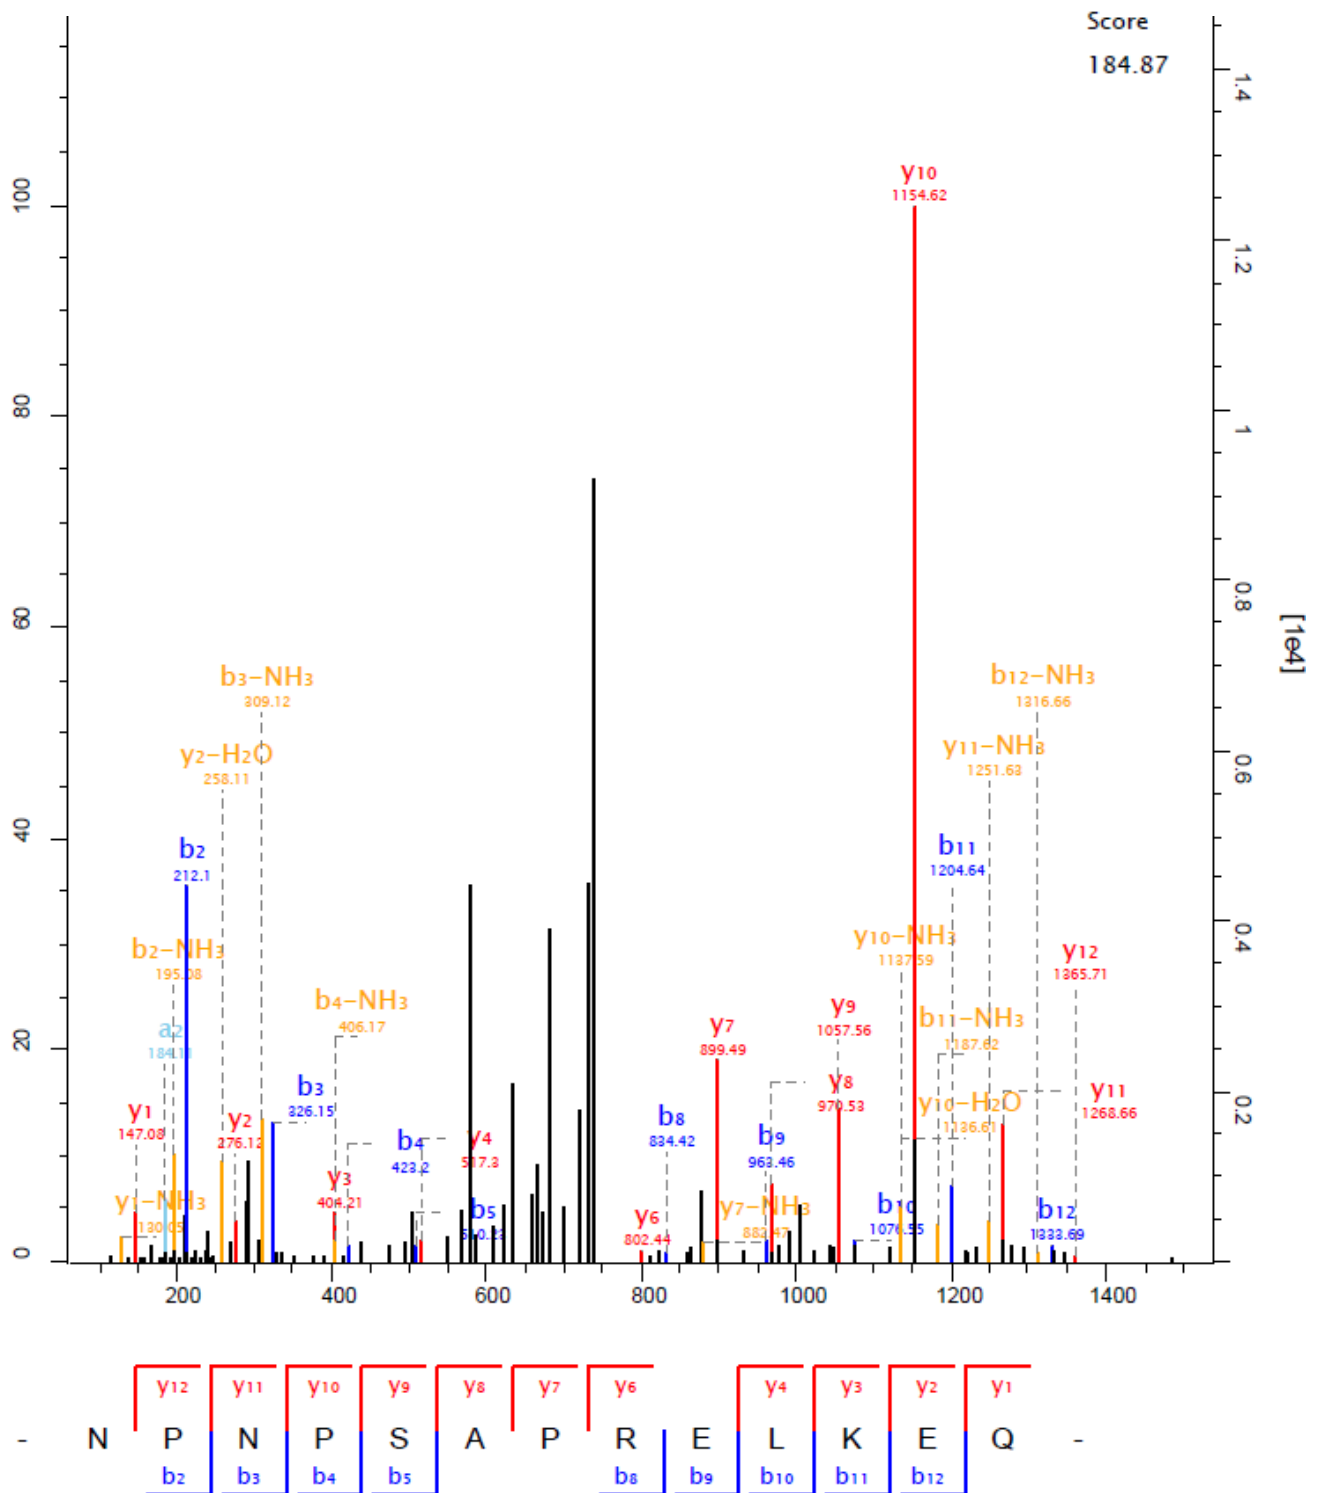

C

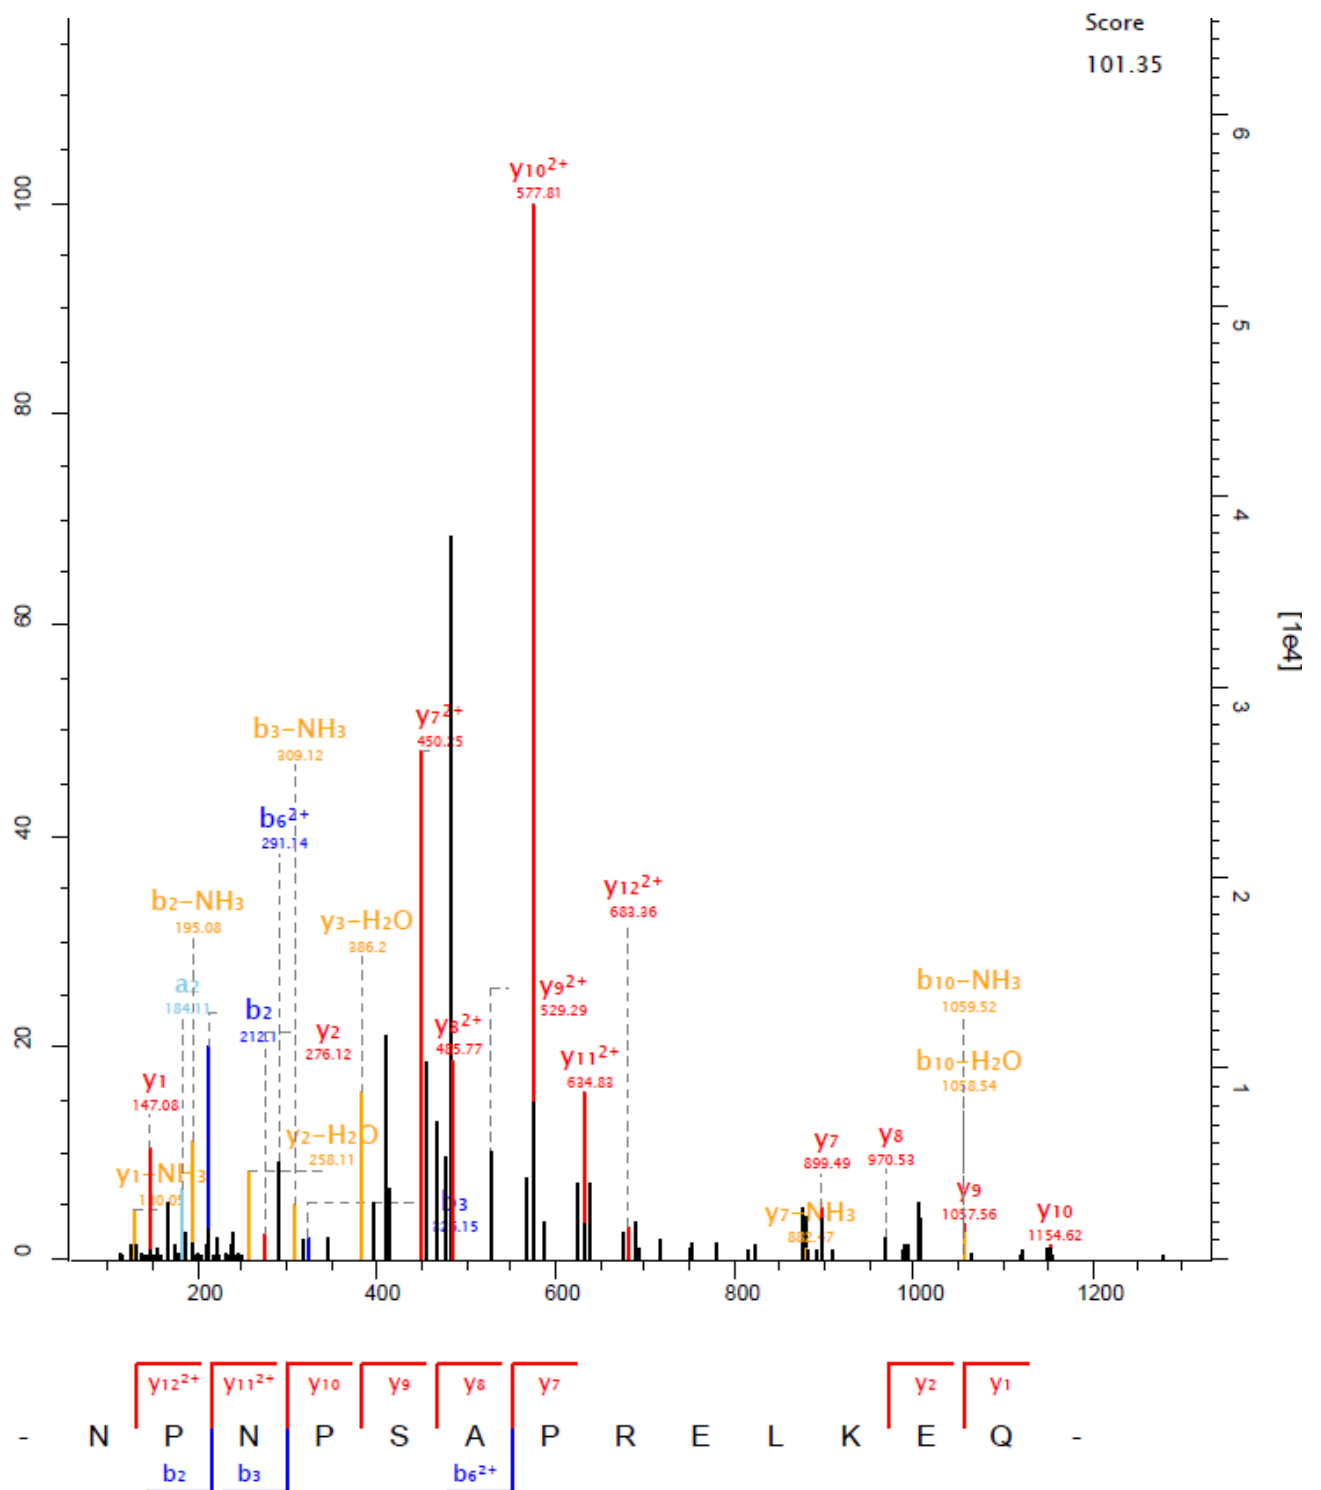

**Fig. S3.** MS/MS fragmentation spectra of the Asn408-Gln420 peptides in an overnight Arg-C digest of NPB- $\alpha$ 2AP as determined by Mascot analysis (A) and MaxQuant analysis (B and C). Best spectrum data is shown.

A

Score: 71

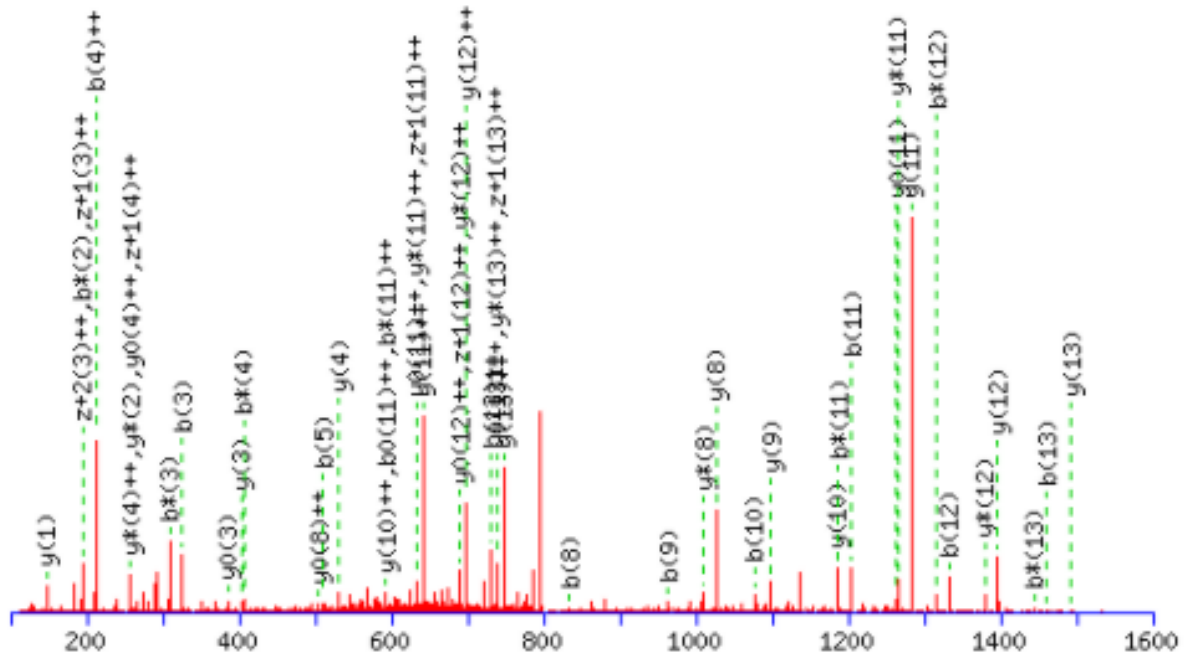

| #  | b                | b <sup>++</sup> | b <sup>+</sup>   | b <sup>+++</sup> | b <sup>0</sup> | b <sup>0++</sup> | c         | c <sup>++</sup> | Seq. | w         | y                | y <sup>++</sup> | y <sup>+</sup>   | y <sup>+++</sup> | y <sup>0</sup>   | y <sup>0++</sup> | z+1       | z+1 <sup>++</sup> | z+2       | z+2 <sup>++</sup> | #         |                 |    |
|----|------------------|-----------------|------------------|------------------|----------------|------------------|-----------|-----------------|------|-----------|------------------|-----------------|------------------|------------------|------------------|------------------|-----------|-------------------|-----------|-------------------|-----------|-----------------|----|
| 1  | 115.0502         | 58.0287         | 98.0237          | 49.5155          |                |                  | 132.0768  | 66.5420         | N    |           |                  |                 |                  |                  |                  |                  |           |                   |           |                   |           | 14              |    |
| 2  | <b>212.1030</b>  | 106.5551        | <b>195.0764</b>  | 98.0418          |                |                  | 229.1295  | 115.0684        | P    | 1450.7285 | <b>1493.7707</b> | <b>747.3890</b> | 1476.7441        | <b>738.8757</b>  | 1475.7601        | <b>738.3837</b>  | 1477.7520 | <b>739.3796</b>   | 1478.7598 | 739.8835          | 1478.7598 | 739.8835        | 13 |
| 3  | <b>326.1459</b>  | 163.5766        | <b>309.1193</b>  | 155.0633         |                |                  | 343.1724  | 172.0899        | N    | 1336.6856 | <b>1396.7179</b> | <b>698.8626</b> | 1379.6914        | <b>690.3493</b>  | 1378.7074        | <b>689.8573</b>  | 1380.6992 | <b>690.8532</b>   | 1381.7070 | 691.3571          | 1381.7070 | 691.3571        | 12 |
| 4  | 423.1987         | <b>212.1030</b> | <b>406.1721</b>  | 203.5897         |                |                  | 440.2252  | 220.6162        | P    | 1239.6328 | <b>1282.6750</b> | <b>641.8411</b> | 1265.6484        | <b>633.3279</b>  | <b>1264.6644</b> | <b>632.8359</b>  | 1266.6563 | <b>633.8318</b>   | 1267.6641 | 634.3357          | 1267.6641 | 634.3357        | 11 |
| 5  | <b>510.2307</b>  | 255.6190        | 493.2041         | 247.1057         | 492.2201       | 246.6137         | 527.2572  | 264.1323        | S    | 1152.6008 | <b>1185.6222</b> | <b>593.3148</b> | 1168.5957        | 584.8015         | 1167.6117        | 584.3095         | 1169.6035 | 585.3054          | 1170.6113 | 585.8093          | 1170.6113 | 585.8093        | 10 |
| 6  | 581.2678         | 291.1375        | 564.2413         | 282.6243         | 563.2572       | 282.1323         | 598.2943  | 299.6508        | A    |           | <b>1098.5902</b> | 549.7987        | 1081.5637        | 541.2855         | 1080.5796        | 540.7935         | 1082.5715 | 541.7894          | 1083.5793 | 542.2933          | 1083.5793 | 542.2933        | 9  |
| 7  | 678.3206         | 339.6639        | 661.2940         | 331.1506         | 660.3100       | 330.6586         | 695.3471  | 348.1772        | P    | 984.5109  | <b>1027.5531</b> | 514.2802        | <b>1010.5265</b> | 505.7669         | 1009.5425        | <b>505.2749</b>  | 1011.5344 | 506.2708          | 1012.5422 | 506.7747          | 1012.5422 | 506.7747        | 8  |
| 8  | <b>834.4217</b>  | 417.7145        | 817.3951         | 409.2012         | 816.4111       | 408.7092         | 851.4482  | 426.2278        | R    | 828.4098  | 930.5003         | 465.7538        | 913.4738         | 457.2405         | 912.4898         | 456.7485         | 914.4816  | 457.7444          | 915.4894  | 458.2483          | 915.4894  | 458.2483        | 7  |
| 9  | <b>963.4643</b>  | 482.2358        | 946.4377         | 473.7225         | 945.4537       | 473.2305         | 980.4908  | 490.7490        | E    |           | 774.3992         | 387.7032        | 757.3727         | 379.1900         | 756.3886         | 378.6980         | 758.3805  | 379.6939          | 759.3883  | 380.1978          | 759.3883  | 380.1978        | 6  |
| 10 | <b>1076.5483</b> | 538.7778        | 1059.5218        | 530.2645         | 1058.5378      | 529.7725         | 1093.5749 | 547.2911        | L    |           | 645.3566         | 323.1819        | 628.3301         | 314.6687         | 627.3461         | 314.1767         | 629.3379  | 315.1726          | 630.3457  | 315.6765          | 630.3457  | 315.6765        | 5  |
| 11 | <b>1204.6433</b> | 602.8253        | <b>1187.6167</b> | <b>594.3120</b>  | 1186.6327      | <b>593.8200</b>  | 1221.6698 | 611.3386        | K    |           | <b>532.2726</b>  | 266.6399        | 515.2460         | <b>258.1266</b>  | 514.2620         | <b>257.6346</b>  | 516.2538  | <b>258.6306</b>   | 517.2617  | 259.1345          | 517.2617  | 259.1345        | 4  |
| 12 | <b>1333.6859</b> | 667.3466        | <b>1316.6593</b> | 658.8333         | 1315.6753      | 658.3413         | 1350.7124 | 675.8599        | E    |           | <b>404.1776</b>  | 202.5924        | 387.1510         | 194.0792         | <b>386.1670</b>  | 193.5872         | 388.1589  | <b>194.5831</b>   | 389.1667  | <b>195.0870</b>   | 389.1667  | <b>195.0870</b> | 3  |
| 13 | <b>1461.7445</b> | <b>731.3759</b> | <b>1444.7179</b> | 722.8626         | 1443.7339      | 722.3706         | 1478.7710 | 739.8891        | Q    |           | 275.1350         | 138.0711        | <b>258.1084</b>  | 129.5579         |                  |                  | 259.1163  | 130.0618          | 260.1241  | 130.5657          | 260.1241  | 130.5657        | 2  |
| 14 |                  |                 |                  |                  |                |                  |           |                 | Q    |           | <b>147.0764</b>  | 74.0418         | 130.0499         | 65.5286          |                  |                  | 131.0577  | 66.0325           | 132.0655  | 66.5364           | 132.0655  | 66.5364         | 1  |





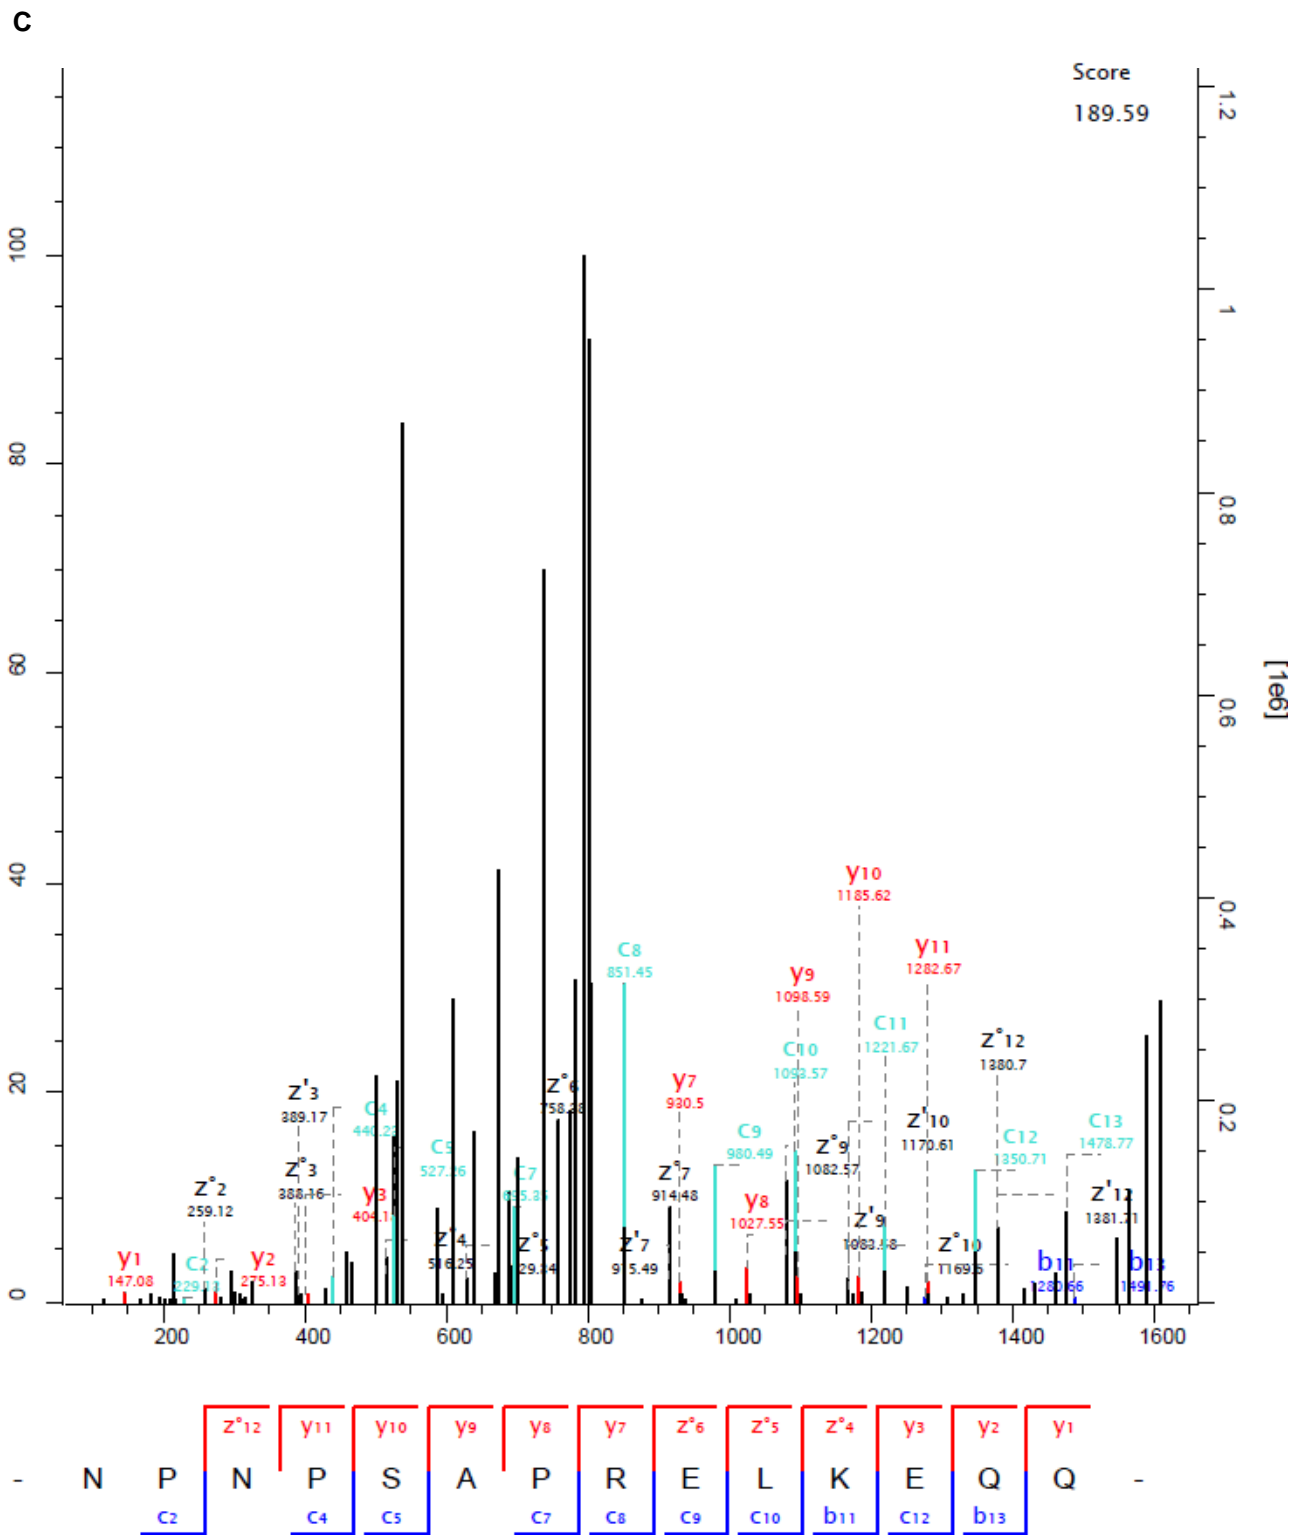

**Fig. S4.** MS/MS fragmentation spectra of the Asn408-Gln421 peptides in an overnight Arg-C digest of NPB- $\alpha$ 2AP as determined by Mascot analysis (A and B) and MaxQuant analysis (C). Best spectrum data is shown.

A

Score: 68

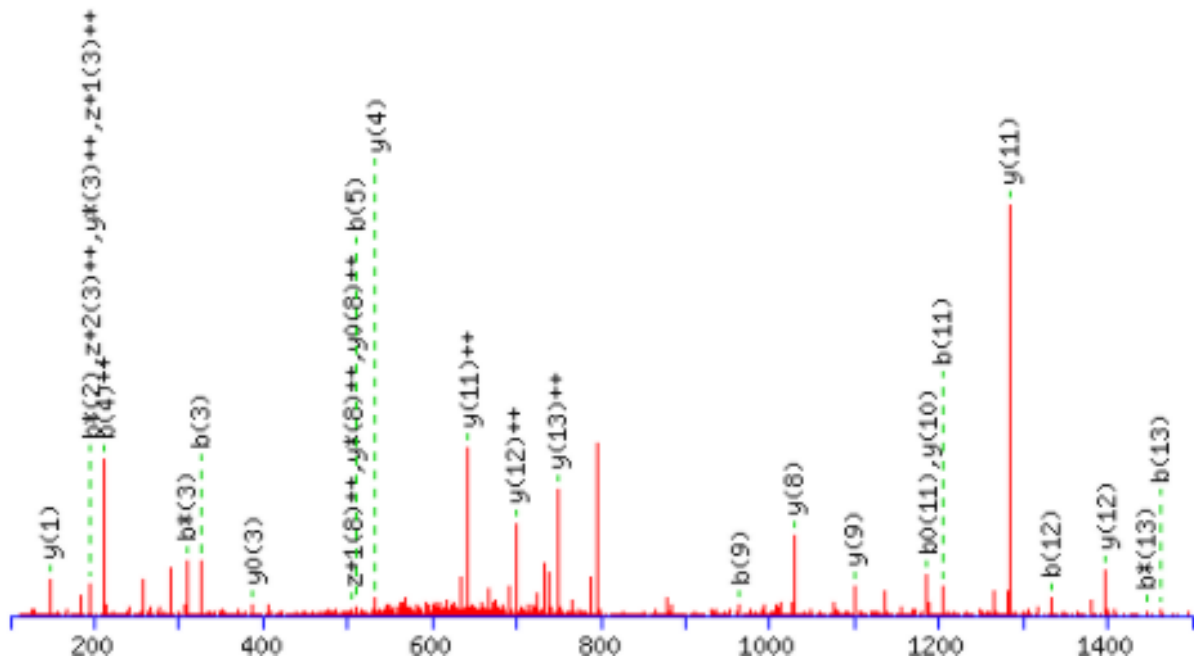

| #  | b                | b <sup>++</sup> | b <sup>*</sup>   | b <sup>+++</sup> | b <sup>0</sup>   | b <sup>0++</sup> | c         | c <sup>++</sup> | Seq. | w         | y                | y <sup>++</sup> | y <sup>*</sup> | y <sup>+++</sup> | y <sup>0</sup>  | y <sup>0++</sup> | z+1       | z+1 <sup>++</sup> | z+2       | z+2 <sup>++</sup> | # |    |
|----|------------------|-----------------|------------------|------------------|------------------|------------------|-----------|-----------------|------|-----------|------------------|-----------------|----------------|------------------|-----------------|------------------|-----------|-------------------|-----------|-------------------|---|----|
| 1  | 115.0502         | 58.0287         | 98.0237          | 49.5155          |                  |                  | 132.0768  | 66.5420         | N    |           |                  |                 |                |                  |                 |                  |           |                   |           |                   |   | 14 |
| 2  | <b>212.1030</b>  | 106.5551        | <b>195.0764</b>  | 98.0418          |                  |                  | 229.1295  | 115.0684        | P    | 1451.7125 | 1494.7547        | <b>747.8810</b> | 1477.7281      | 739.3677         | 1476.7441       | 738.8757         | 1478.7360 | 739.8716          | 1479.7438 | 740.3755          |   | 13 |
| 3  | <b>326.1459</b>  | 163.5766        | <b>309.1193</b>  | 155.0633         |                  |                  | 343.1724  | 172.0899        | N    | 1337.6696 | <b>1397.7019</b> | <b>699.3546</b> | 1380.6754      | 690.8413         | 1379.6914       | 690.3493         | 1381.6832 | 691.3452          | 1382.6910 | 691.8492          |   | 12 |
| 4  | 423.1987         | <b>212.1030</b> | 406.1721         | 203.5897         |                  |                  | 440.2252  | 220.6162        | P    | 1240.6168 | <b>1283.6590</b> | <b>642.3331</b> | 1266.6325      | 633.8199         | 1265.6484       | 633.3279         | 1267.6403 | 634.3238          | 1268.6481 | 634.8277          |   | 11 |
| 5  | <b>510.2307</b>  | 255.6190        | 493.2041         | 247.1057         | 492.2201         | 246.6137         | 527.2572  | 264.1323        | S    | 1153.5848 | <b>1186.6062</b> | 593.8068        | 1169.5797      | 585.2935         | 1168.5957       | 584.8015         | 1170.5875 | 585.7974          | 1171.5953 | 586.3013          |   | 10 |
| 6  | 581.2678         | 291.1375        | 564.2413         | 282.6243         | 563.2572         | 282.1323         | 598.2943  | 299.6508        | A    |           | <b>1099.5742</b> | 550.2907        | 1082.5477      | 541.7775         | 1081.5637       | 541.2855         | 1083.5555 | 542.2814          | 1084.5633 | 542.7853          |   | 9  |
| 7  | 678.3206         | 339.6639        | 661.2940         | 331.1506         | 660.3100         | 330.6586         | 695.3471  | 348.1772        | P    | 985.4949  | <b>1028.5371</b> | 514.7722        | 1011.5106      | <b>506.2589</b>  | 1010.5265       | <b>505.7669</b>  | 1012.5184 | <b>506.7628</b>   | 1013.5262 | 507.2667          |   | 8  |
| 8  | 834.4217         | 417.7145        | 817.3951         | 409.2012         | 816.4111         | 408.7092         | 851.4482  | 426.2278        | R    | 829.3938  | 931.4843         | 466.2458        | 914.4578       | 457.7325         | 913.4738        | 457.2405         | 915.4656  | 458.2364          | 916.4734  | 458.7404          |   | 7  |
| 9  | <b>963.4643</b>  | 482.2358        | 946.4377         | 473.7225         | 945.4537         | 473.2305         | 980.4908  | 490.7490        | E    |           | 775.3832         | 388.1953        | 758.3567       | 379.6820         | 757.3727        | 379.1900         | 759.3645  | 380.1859          | 760.3723  | 380.6898          |   | 6  |
| 10 | 1076.5483        | 538.7778        | 1059.5218        | 530.2645         | 1058.5378        | 529.7725         | 1093.5749 | 547.2911        | L    |           | 646.3406         | 323.6740        | 629.3141       | 315.1607         | 628.3301        | 314.6687         | 630.3219  | 315.6646          | 631.3297  | 316.1685          |   | 5  |
| 11 | <b>1204.6433</b> | 602.8253        | 1187.6167        | 594.3120         | <b>1186.6327</b> | 593.8200         | 1221.6698 | 611.3386        | K    |           | <b>533.2566</b>  | 267.1319        | 516.2300       | 258.6186         | 515.2460        | 258.1266         | 517.2378  | 259.1226          | 518.2457  | 259.6265          |   | 4  |
| 12 | <b>1333.6859</b> | 667.3466        | 1316.6593        | 658.8333         | 1315.6753        | 658.3413         | 1350.7124 | 675.8599        | E    |           | 405.1616         | 203.0844        | 388.1351       | <b>194.5712</b>  | <b>387.1510</b> | 194.0792         | 389.1429  | <b>195.0751</b>   | 390.1507  | <b>195.5790</b>   |   | 3  |
| 13 | <b>1462.7285</b> | 731.8679        | <b>1445.7019</b> | 723.3546         | 1444.7179        | 722.8626         | 1479.7550 | 740.3812        | Q    |           | 276.1190         | 138.5631        | 259.0925       | 130.0499         |                 |                  | 260.1003  | 130.5538          | 261.1081  | 131.0577          |   | 2  |
| 14 |                  |                 |                  |                  |                  |                  |           |                 | Q    |           | <b>147.0764</b>  | 74.0418         | 130.0499       | 65.5286          |                 |                  | 131.0577  | 66.0325           | 132.0655  | 66.5364           |   | 1  |

B

Score: 49

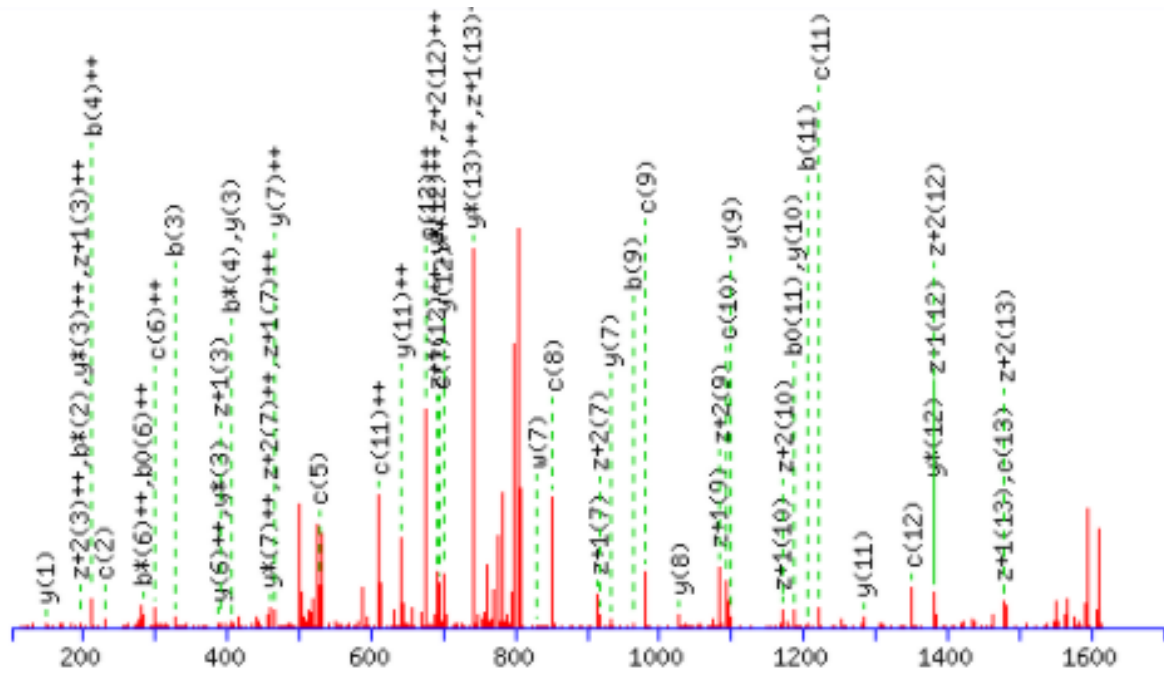

| #  | b                | b <sup>++</sup> | b <sup>+</sup>  | b <sup>+++</sup> | b <sup>0</sup>   | b <sup>0++</sup> | c                | c <sup>++</sup> | Seq. | w               | y                | y <sup>++</sup> | y <sup>+</sup>   | y <sup>+++</sup> | y <sup>0</sup> | y <sup>0++</sup> | z+1              | z+1 <sup>++</sup> | z+2              | z+2 <sup>++</sup> | #         |    |
|----|------------------|-----------------|-----------------|------------------|------------------|------------------|------------------|-----------------|------|-----------------|------------------|-----------------|------------------|------------------|----------------|------------------|------------------|-------------------|------------------|-------------------|-----------|----|
| 1  | 115.0502         | 58.0287         | 98.0237         | 49.5155          |                  |                  | 132.0768         | 66.5420         | N    |                 |                  |                 |                  |                  |                |                  |                  |                   |                  |                   |           | 14 |
| 2  | <b>212.1030</b>  | 106.5551        | <b>195.0764</b> | 98.0418          |                  |                  | <b>229.1295</b>  | 115.0684        | P    | 1451.7125       | 1494.7547        | 747.8810        | 1477.7281        | <b>739.3677</b>  | 1476.7441      | 738.8757         | <b>1478.7360</b> | <b>739.8716</b>   | <b>1479.7438</b> | <b>740.3755</b>   | <b>13</b> |    |
| 3  | <b>326.1459</b>  | 163.5766        | 309.1193        | 155.0633         |                  |                  | 343.1724         | 172.0899        | N    | 1337.6696       | 1397.7019        | <b>699.3546</b> | <b>1380.6754</b> | <b>690.8413</b>  | 1379.6914      | 690.3493         | <b>1381.6832</b> | <b>691.3452</b>   | <b>1382.6910</b> | <b>691.8492</b>   | <b>12</b> |    |
| 4  | 423.1987         | <b>212.1030</b> | <b>406.1721</b> | 203.5897         |                  |                  | 440.2252         | 220.6162        | P    | 1240.6168       | <b>1283.6590</b> | <b>642.3331</b> | 1266.6325        | 633.8199         | 1265.6484      | 633.3279         | 1267.6403        | 634.3238          | 1268.6481        | 634.8277          | <b>11</b> |    |
| 5  | 510.2307         | 255.6190        | 493.2041        | 247.1057         | 492.2201         | 246.6137         | <b>527.2572</b>  | 264.1323        | S    | 1153.5848       | <b>1186.6062</b> | 593.8068        | 1169.5797        | 585.2935         | 1168.5957      | 584.8015         | <b>1170.5875</b> | 585.7974          | <b>1171.5953</b> | 586.3013          | <b>10</b> |    |
| 6  | 581.2678         | 291.1375        | 564.2413        | <b>282.6243</b>  | 563.2572         | <b>282.1323</b>  | 598.2943         | <b>299.6508</b> | A    |                 | <b>1099.5742</b> | 550.2907        | 1082.5477        | 541.7775         | 1081.5637      | 541.2855         | <b>1083.5555</b> | 542.2814          | <b>1084.5633</b> | 542.7853          | <b>9</b>  |    |
| 7  | 678.3206         | 339.6639        | 661.2940        | 331.1506         | 660.3100         | 330.6586         | <b>695.3471</b>  | 348.1772        | P    | 985.4949        | <b>1028.5371</b> | 514.7722        | 1011.5106        | 506.2589         | 1010.5265      | 505.7669         | 1012.5184        | 506.7628          | 1013.5262        | 507.2667          | <b>8</b>  |    |
| 8  | 834.4217         | 417.7145        | 817.3951        | 409.2012         | 816.4111         | 408.7092         | <b>851.4482</b>  | 426.2278        | R    | <b>829.3938</b> | <b>931.4843</b>  | <b>466.2458</b> | 914.4578         | <b>457.7325</b>  | 913.4738       | 457.2405         | <b>915.4656</b>  | <b>458.2364</b>   | <b>916.4734</b>  | <b>458.7404</b>   | <b>7</b>  |    |
| 9  | <b>963.4643</b>  | 482.2358        | 946.4377        | 473.7225         | 945.4537         | 473.2305         | <b>980.4908</b>  | 490.7490        | E    |                 | 775.3832         | <b>388.1953</b> | 758.3567         | 379.6820         | 757.3727       | 379.1900         | 759.3645         | 380.1859          | 760.3723         | 380.6898          | <b>6</b>  |    |
| 10 | 1076.5483        | 538.7778        | 1059.5218       | 530.2645         | 1058.5378        | 529.7725         | <b>1093.5749</b> | 547.2911        | L    |                 | 646.3406         | 323.6740        | 629.3141         | 315.1607         | 628.3301       | 314.6687         | 630.3219         | 315.6646          | 631.3297         | 316.1685          | <b>5</b>  |    |
| 11 | <b>1204.6433</b> | 602.8253        | 1187.6167       | 594.3120         | <b>1186.6327</b> | 593.8200         | <b>1221.6698</b> | <b>611.3386</b> | K    |                 | 533.2566         | 267.1319        | 516.2300         | 258.6186         | 515.2460       | 258.1266         | 517.2378         | 259.1226          | 518.2457         | 259.6265          | <b>4</b>  |    |
| 12 | 1333.6859        | 667.3466        | 1316.6593       | 658.8333         | 1315.6753        | 658.3413         | <b>1350.7124</b> | <b>675.8599</b> | E    |                 | <b>405.1616</b>  | 203.0844        | <b>388.1351</b>  | <b>194.5712</b>  | 387.1510       | 194.0792         | <b>389.1429</b>  | <b>195.0751</b>   | 390.1507         | <b>195.5790</b>   | <b>3</b>  |    |
| 13 | 1461.7445        | 731.3759        | 1444.7179       | 722.8626         | 1443.7339        | 722.3706         | <b>1478.7710</b> | <b>739.8891</b> | Q    |                 | 276.1190         | 138.5631        | 259.0925         | 130.0499         |                |                  | 260.1003         | 130.5538          | 261.1081         | 131.0577          | <b>2</b>  |    |
| 14 |                  |                 |                 |                  |                  |                  |                  |                 | Q    |                 | <b>148.0604</b>  | 74.5339         | 131.0339         | 66.0206          |                |                  | 132.0417         | 66.5245           | 133.0495         | 67.0284           | <b>1</b>  |    |

C

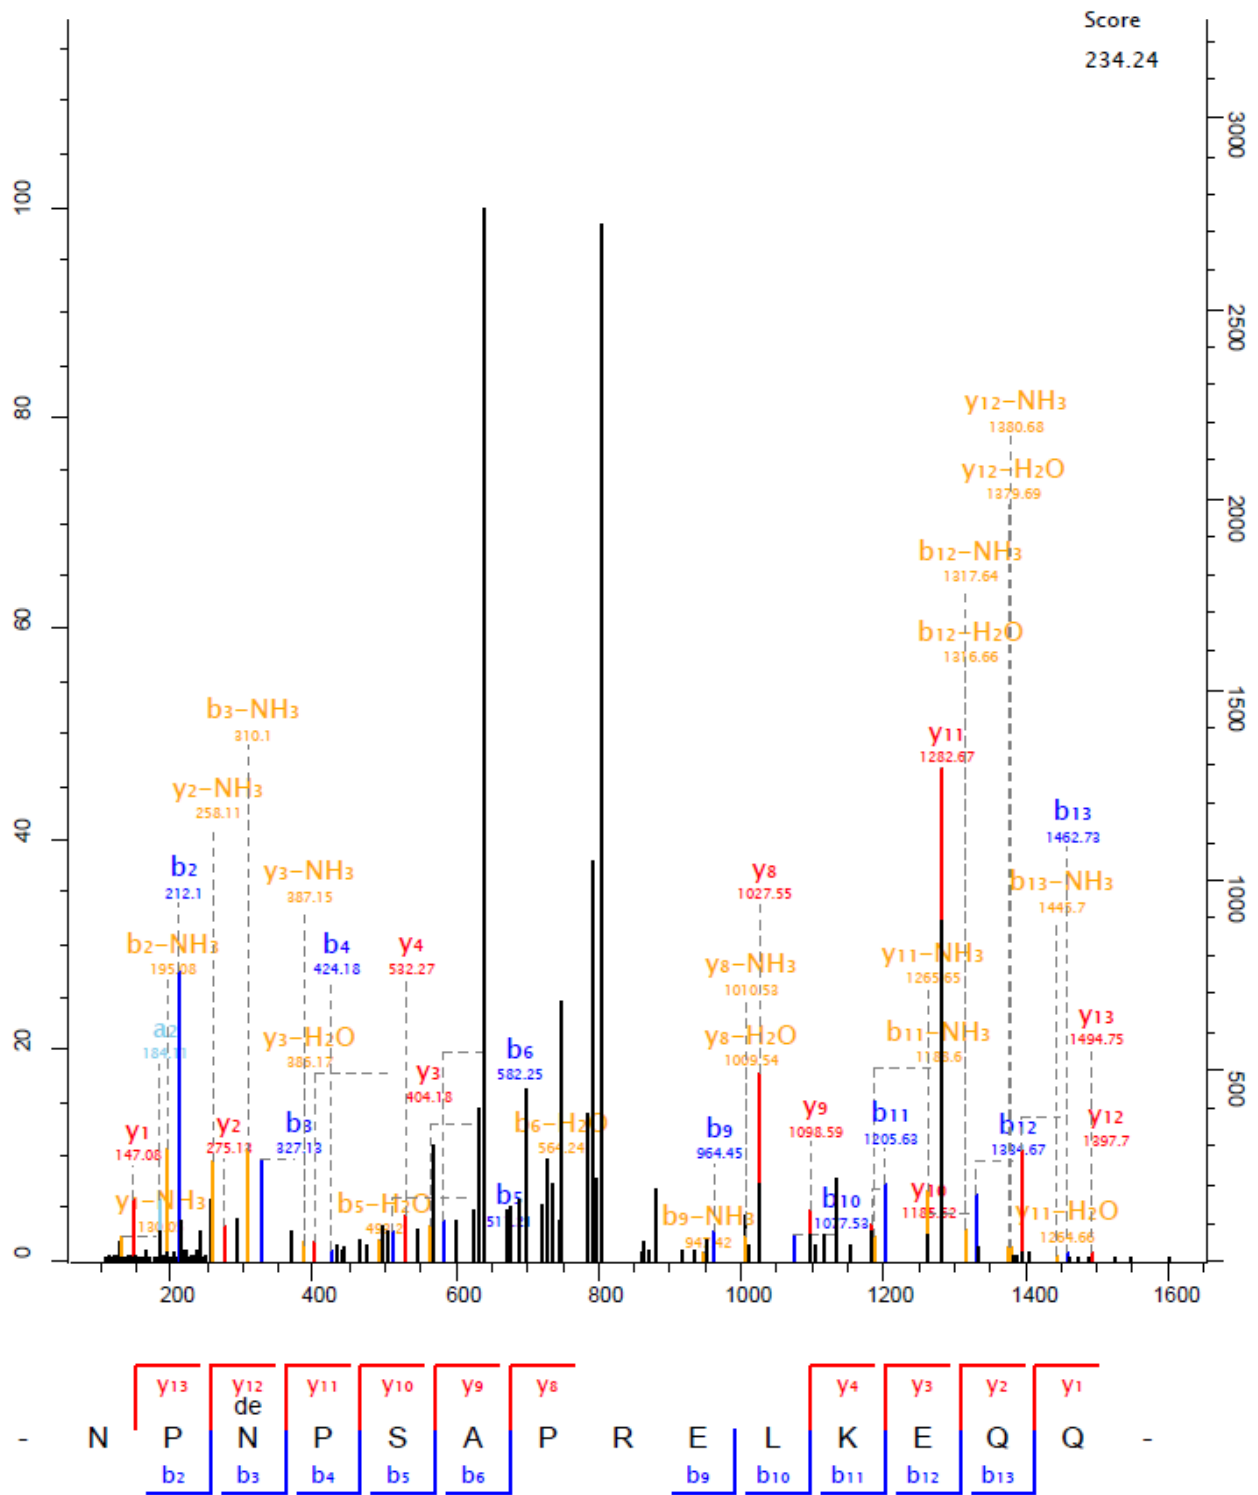

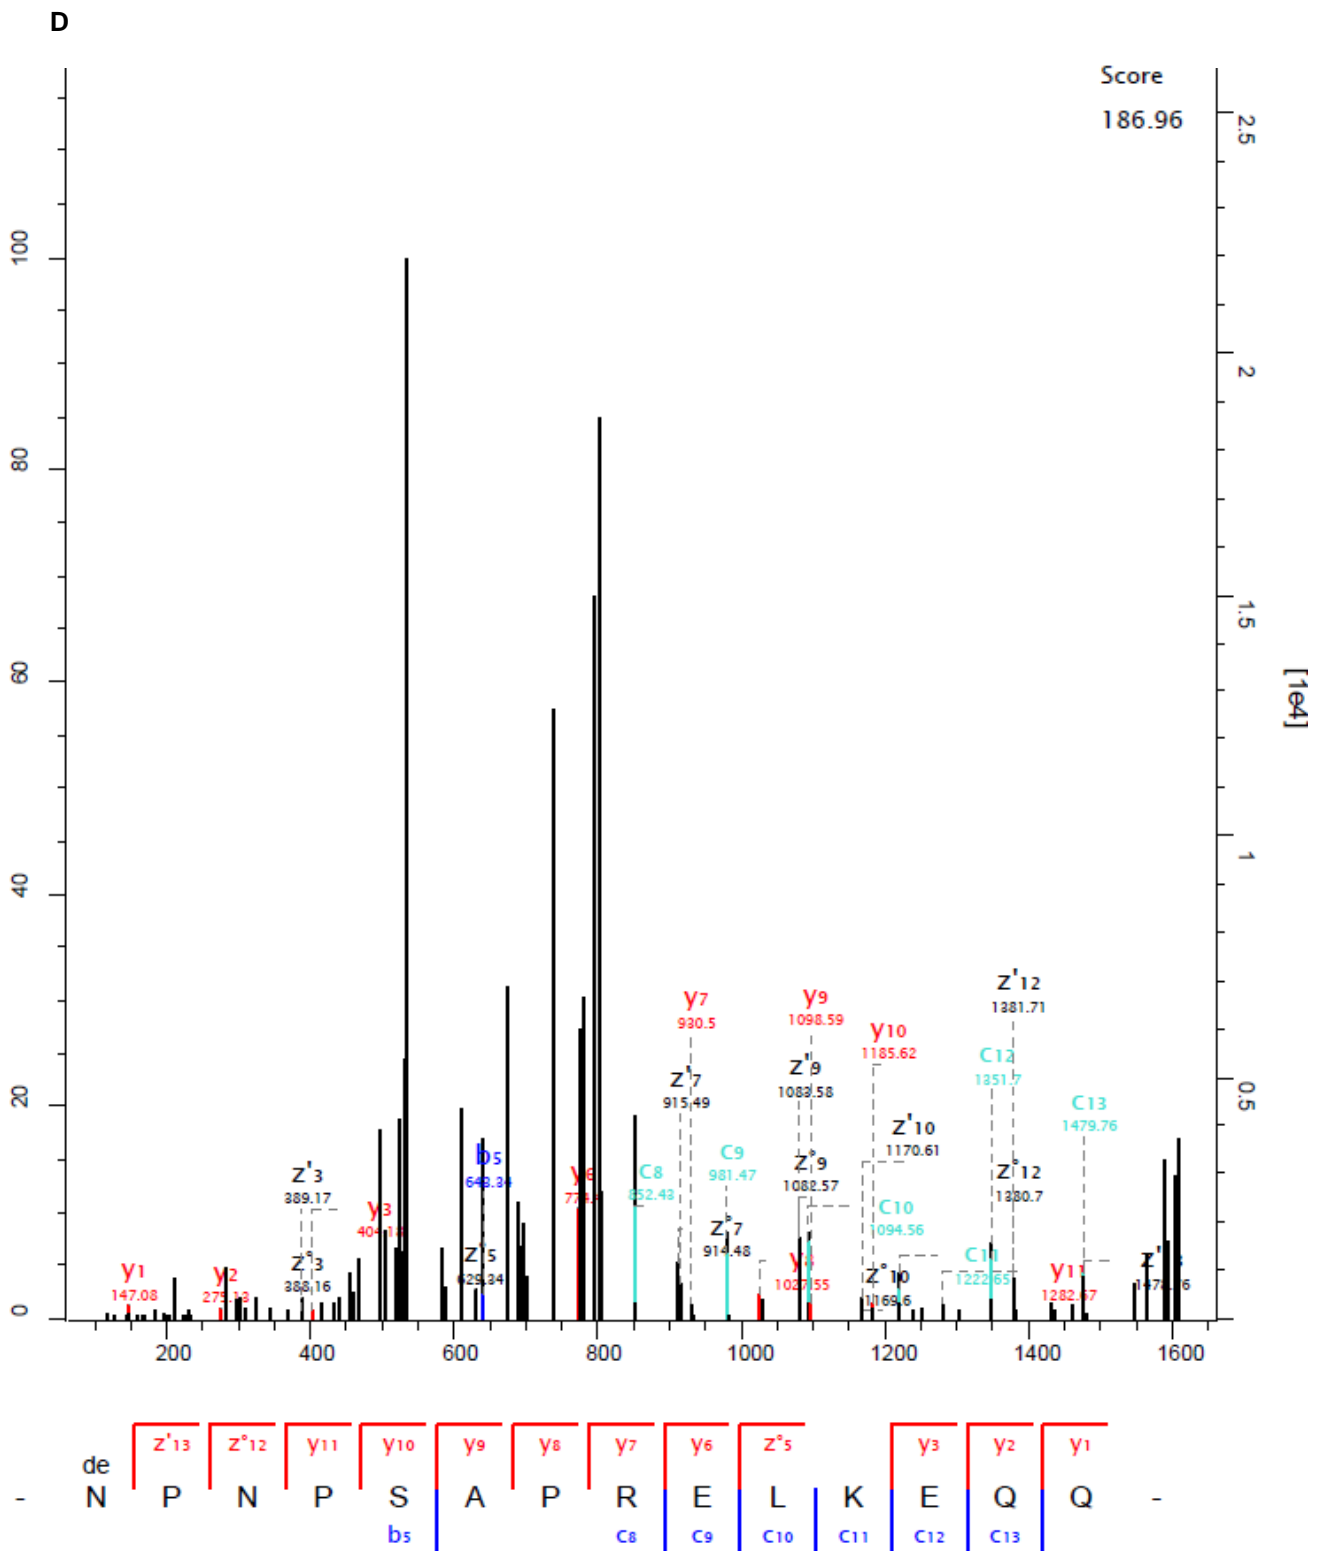

**Fig. S5.** MS/MS fragmentation spectra of the deamidated Asn408-Gln421 peptides in an overnight Arg-C digest of NPB- $\alpha$ 2AP as determined by Mascot analysis (A and B) and MaxQuant analysis (C and D). Best spectrum data is shown.

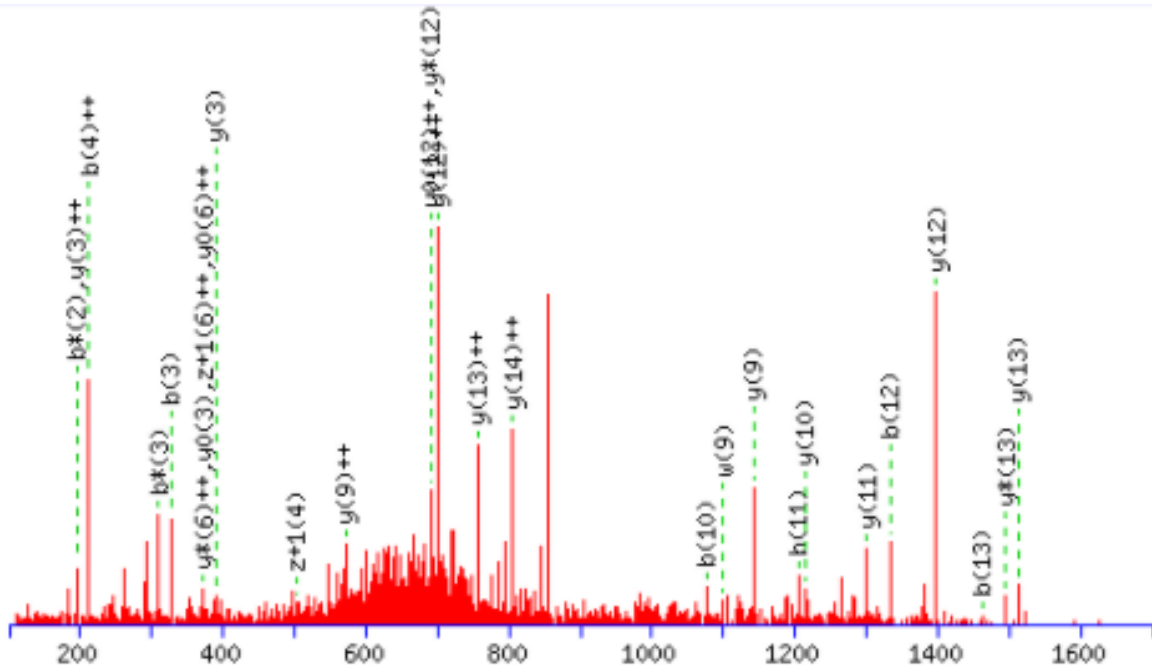

| #  | b                | b <sup>++</sup> | b <sup>*</sup>  | b <sup>+++</sup> | b <sup>0</sup> | b <sup>0++</sup> | c         | c <sup>++</sup> | Seq. | w                | y                | y <sup>++</sup> | y <sup>*</sup>   | y <sup>+++</sup> | y <sup>0</sup>  | y <sup>0++</sup> | z+1             | z+1 <sup>++</sup> | z+2       | z+2 <sup>++</sup> | #  |
|----|------------------|-----------------|-----------------|------------------|----------------|------------------|-----------|-----------------|------|------------------|------------------|-----------------|------------------|------------------|-----------------|------------------|-----------------|-------------------|-----------|-------------------|----|
| 1  | 115.0502         | 58.0287         | 98.0237         | 49.5155          |                |                  | 132.0768  | 66.5420         | N    |                  |                  |                 |                  |                  |                 |                  |                 |                   |           |                   | 15 |
| 2  | <b>212.1030</b>  | 106.5551        | <b>195.0764</b> | 98.0418          |                |                  | 229.1295  | 115.0684        | P    | 1565.7554        | 1608.7976        | <b>804.9025</b> | 1591.7711        | 796.3892         | 1590.7871       | 795.8972         | 1592.7789       | 796.8931          | 1593.7867 | 797.3970          | 14 |
| 3  | <b>326.1459</b>  | 163.5766        | <b>309.1193</b> | 155.0633         |                |                  | 343.1724  | 172.0899        | N    | 1451.7125        | <b>1511.7449</b> | <b>756.3761</b> | <b>1494.7183</b> | 747.8628         | 1493.7343       | 747.3708         | 1495.7261       | 748.3667          | 1496.7340 | 748.8706          | 13 |
| 4  | 423.1987         | <b>212.1030</b> | 406.1721        | 203.5897         |                |                  | 440.2252  | 220.6162        | P    | 1354.6597        | <b>1397.7019</b> | <b>699.3546</b> | 1380.6754        | <b>690.8413</b>  | 1379.6914       | <b>690.3493</b>  | 1381.6832       | <b>691.3452</b>   | 1382.6910 | 691.8492          | 12 |
| 5  | 510.2307         | 255.6190        | 493.2041        | 247.1057         | 492.2201       | 246.6137         | 527.2572  | 264.1323        | S    | 1267.6277        | <b>1300.6492</b> | 650.8282        | 1283.6226        | 642.3149         | 1282.6386       | 641.8229         | 1284.6304       | 642.8189          | 1285.6383 | 643.3228          | 11 |
| 6  | 581.2678         | 291.1375        | 564.2413        | 282.6243         | 563.2572       | 282.1323         | 598.2943  | 299.6508        | A    |                  |                  |                 |                  |                  |                 |                  |                 |                   |           |                   | 10 |
| 7  | 678.3206         | 339.6639        | 661.2940        | 331.1506         | 660.3100       | 330.6586         | 695.3471  | 348.1772        | P    | <b>1099.5378</b> | <b>1142.5800</b> | <b>571.7937</b> | 1125.5535        | 563.2804         | 1124.5695       | 562.7884         | 1126.5613       | 563.7843          | 1127.5691 | 564.2882          | 9  |
| 8  | 834.4217         | 417.7145        | 817.3951        | 409.2012         | 816.4111       | 408.7092         | 851.4482  | 426.2278        | R    | 943.4367         | 1045.5273        | 523.2673        | 1028.5007        | 514.7540         | 1027.5167       | 514.2620         | 1029.5085       | 515.2579          | 1030.5164 | 515.7618          | 8  |
| 9  | 963.4643         | 482.2358        | 946.4377        | 473.7225         | 945.4537       | 473.2305         | 980.4908  | 490.7490        | E    |                  | 889.4262         | 445.2167        | 872.3996         | 436.7034         | 871.4156        | 436.2114         | 873.4074        | 437.2074          | 874.4153  | 437.7113          | 7  |
| 10 | <b>1076.5483</b> | 538.7778        | 1059.5218       | 530.2645         | 1058.5378      | 529.7725         | 1093.5749 | 547.2911        | L    |                  | 760.3836         | 380.6954        | 743.3570         | <b>372.1821</b>  | 742.3730        | <b>371.6901</b>  | 744.3648        | <b>372.6861</b>   | 745.3727  | 373.1900          | 6  |
| 11 | <b>1204.6433</b> | 602.8253        | 1187.6167       | 594.3120         | 1186.6327      | 593.8200         | 1221.6698 | 611.3386        | K    |                  | 647.2995         | 324.1534        | 630.2729         | 315.6401         | 629.2889        | 315.1481         | 631.2808        | 316.1440          | 632.2886  | 316.6479          | 5  |
| 12 | <b>1333.6859</b> | 667.3466        | 1316.6593       | 658.8333         | 1315.6753      | 658.3413         | 1350.7124 | 675.8599        | E    |                  | 519.2045         | 260.1059        | 502.1780         | 251.5926         | 501.1940        | 251.1006         | <b>503.1858</b> | 252.0965          | 504.1936  | 252.6005          | 4  |
| 13 | <b>1461.7445</b> | 731.3759        | 1444.7179       | 722.8626         | 1443.7339      | 722.3706         | 1478.7710 | 739.8891        | Q    |                  | <b>390.1619</b>  | <b>195.5846</b> | 373.1354         | 187.0713         | <b>372.1514</b> | 186.5793         | 374.1432        | 187.5752          | 375.1510  | 188.0792          | 3  |
| 14 | 1589.8030        | 795.4052        | 1572.7765       | 786.8919         | 1571.7925      | 786.3999         | 1606.8296 | 803.9184        | Q    |                  | 262.1034         | 131.5553        | 245.0768         | 123.0420         | 244.0928        | 122.5500         | 246.0846        | 123.5460          | 247.0925  | 124.0499          | 2  |
| 15 |                  |                 |                 |                  |                |                  |           |                 | D    |                  | 134.0448         | 67.5260         |                  |                  | 116.0342        | 58.5207          | 118.0261        | 59.5167           | 119.0339  | 60.0206           | 1  |



B

Score: 61

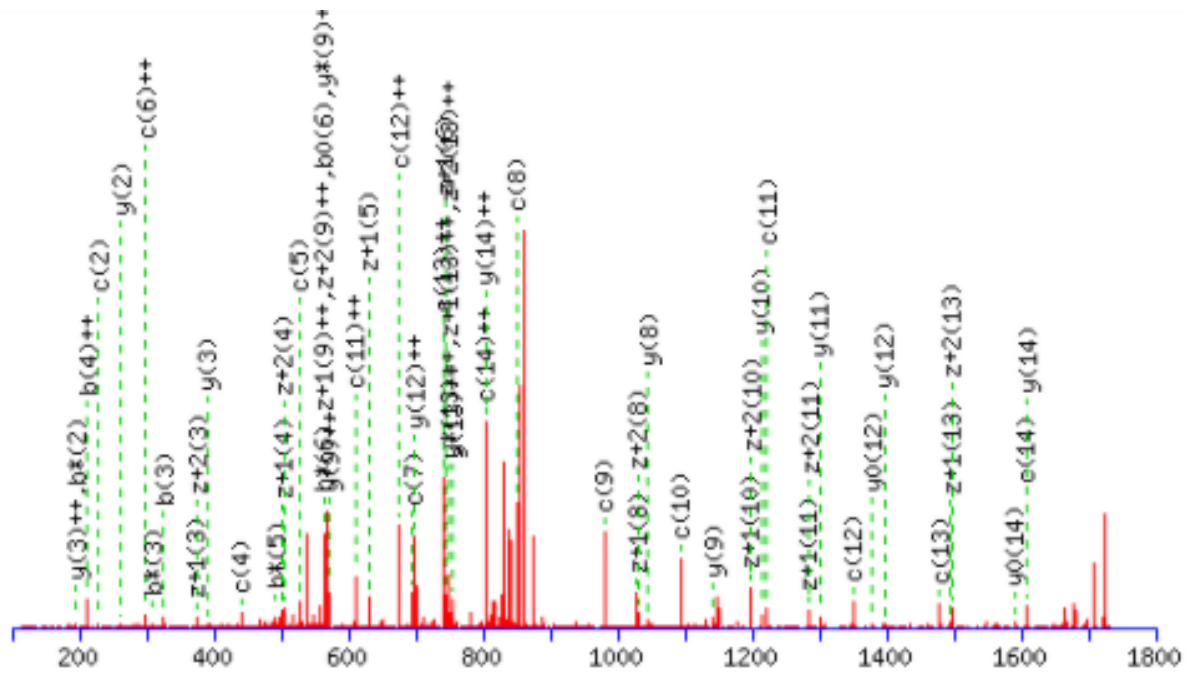

| #  | b         | b <sup>++</sup> | b <sup>*</sup> | b <sup>+++</sup> | b <sup>0</sup> | b <sup>0++</sup> | c         | c <sup>++</sup> | Seq. | w         | y         | y <sup>++</sup> | y <sup>*</sup> | y <sup>+++</sup> | y <sup>0</sup> | y <sup>0++</sup> | z+1       | z+1 <sup>++</sup> | z+2       | z+2 <sup>++</sup> | #  |
|----|-----------|-----------------|----------------|------------------|----------------|------------------|-----------|-----------------|------|-----------|-----------|-----------------|----------------|------------------|----------------|------------------|-----------|-------------------|-----------|-------------------|----|
| 1  | 115.0502  | 58.0287         | 98.0237        | 49.5155          |                |                  | 132.0768  | 66.5420         | N    |           |           |                 |                |                  |                |                  |           |                   |           |                   | 15 |
| 2  | 212.1030  | 106.5551        | 195.0764       | 98.0418          |                |                  | 229.1295  | 115.0684        | P    | 1565.7554 | 1608.7976 | 804.9025        | 1591.7711      | 796.3892         | 1590.7871      | 795.8972         | 1592.7789 | 796.8931          | 1593.7867 | 797.3970          | 14 |
| 3  | 326.1459  | 163.5766        | 309.1193       | 155.0633         |                |                  | 343.1724  | 172.0899        | N    | 1451.7125 | 1511.7449 | 756.3761        | 1494.7183      | 747.8628         | 1493.7343      | 747.3708         | 1495.7261 | 748.3667          | 1496.7340 | 748.8706          | 13 |
| 4  | 423.1987  | 212.1030        | 406.1721       | 203.5897         |                |                  | 440.2252  | 220.6162        | P    | 1354.6597 | 1397.7019 | 699.3546        | 1380.6754      | 690.8413         | 1379.6914      | 690.3493         | 1381.6832 | 691.3452          | 1382.6910 | 691.8492          | 12 |
| 5  | 510.2307  | 255.6190        | 493.2041       | 247.1057         | 492.2201       | 246.6137         | 527.2572  | 264.1323        | S    | 1267.6277 | 1300.6492 | 650.8282        | 1283.6226      | 642.3149         | 1282.6386      | 641.8229         | 1284.6304 | 642.8189          | 1285.6383 | 643.3228          | 11 |
| 6  | 581.2678  | 291.1375        | 564.2413       | 282.6243         | 563.2572       | 282.1323         | 598.2943  | 299.6508        | A    |           | 1213.6171 | 607.3122        | 1196.5906      | 598.7989         | 1195.6066      | 598.3069         | 1197.5984 | 599.3028          | 1198.6062 | 599.8068          | 10 |
| 7  | 678.3206  | 339.6639        | 661.2940       | 331.1506         | 660.3100       | 330.6586         | 695.3471  | 348.1772        | P    | 1099.5378 | 1142.5800 | 571.7937        | 1125.5535      | 563.2804         | 1124.5695      | 562.7884         | 1126.5613 | 563.7843          | 1127.5691 | 564.2882          | 9  |
| 8  | 834.4217  | 417.7145        | 817.3951       | 409.2012         | 816.4111       | 408.7092         | 851.4482  | 426.2278        | R    | 943.4367  | 1045.5273 | 523.2673        | 1028.5007      | 514.7540         | 1027.5167      | 514.2620         | 1029.5085 | 515.2579          | 1030.5164 | 515.7618          | 8  |
| 9  | 963.4643  | 482.2358        | 946.4377       | 473.7225         | 945.4537       | 473.2305         | 980.4908  | 490.7490        | E    |           | 889.4262  | 445.2167        | 872.3996       | 436.7034         | 871.4156       | 436.2114         | 873.4074  | 437.2074          | 874.4153  | 437.7113          | 7  |
| 10 | 1076.5483 | 538.7778        | 1059.5218      | 530.2645         | 1058.5378      | 529.7725         | 1093.5749 | 547.2911        | L    |           | 760.3836  | 380.6954        | 743.3570       | 372.1821         | 742.3730       | 371.6901         | 744.3648  | 372.6861          | 745.3727  | 373.1900          | 6  |
| 11 | 1204.6433 | 602.8253        | 1187.6167      | 594.3120         | 1186.6327      | 593.8200         | 1221.6698 | 611.3386        | K    |           | 647.2995  | 324.1534        | 630.2729       | 315.6401         | 629.2889       | 315.1481         | 631.2808  | 316.1440          | 632.2886  | 316.6479          | 5  |
| 12 | 1333.6859 | 667.3466        | 1316.6593      | 658.8333         | 1315.6753      | 658.3413         | 1350.7124 | 675.8599        | E    |           | 519.2045  | 260.1059        | 502.1780       | 251.5926         | 501.1940       | 251.1006         | 503.1858  | 252.0965          | 504.1936  | 252.6005          | 4  |
| 13 | 1461.7445 | 731.3759        | 1444.7179      | 722.8626         | 1443.7339      | 722.3706         | 1478.7710 | 739.8891        | Q    |           | 390.1619  | 195.5846        | 373.1354       | 187.0713         | 372.1514       | 186.5793         | 374.1432  | 187.5752          | 375.1510  | 188.0792          | 3  |
| 14 | 1589.8030 | 795.4052        | 1572.7765      | 786.8919         | 1571.7925      | 786.3999         | 1606.8296 | 803.9184        | Q    |           | 262.1034  | 131.5553        | 245.0768       | 123.0420         | 244.0928       | 122.5500         | 246.0846  | 123.5460          | 247.0925  | 124.0499          | 2  |
| 15 |           |                 |                |                  |                |                  |           |                 | D    |           | 134.0448  | 67.5260         |                |                  | 116.0342       | 58.5207          | 118.0261  | 59.5167           | 119.0339  | 60.0206           | 1  |



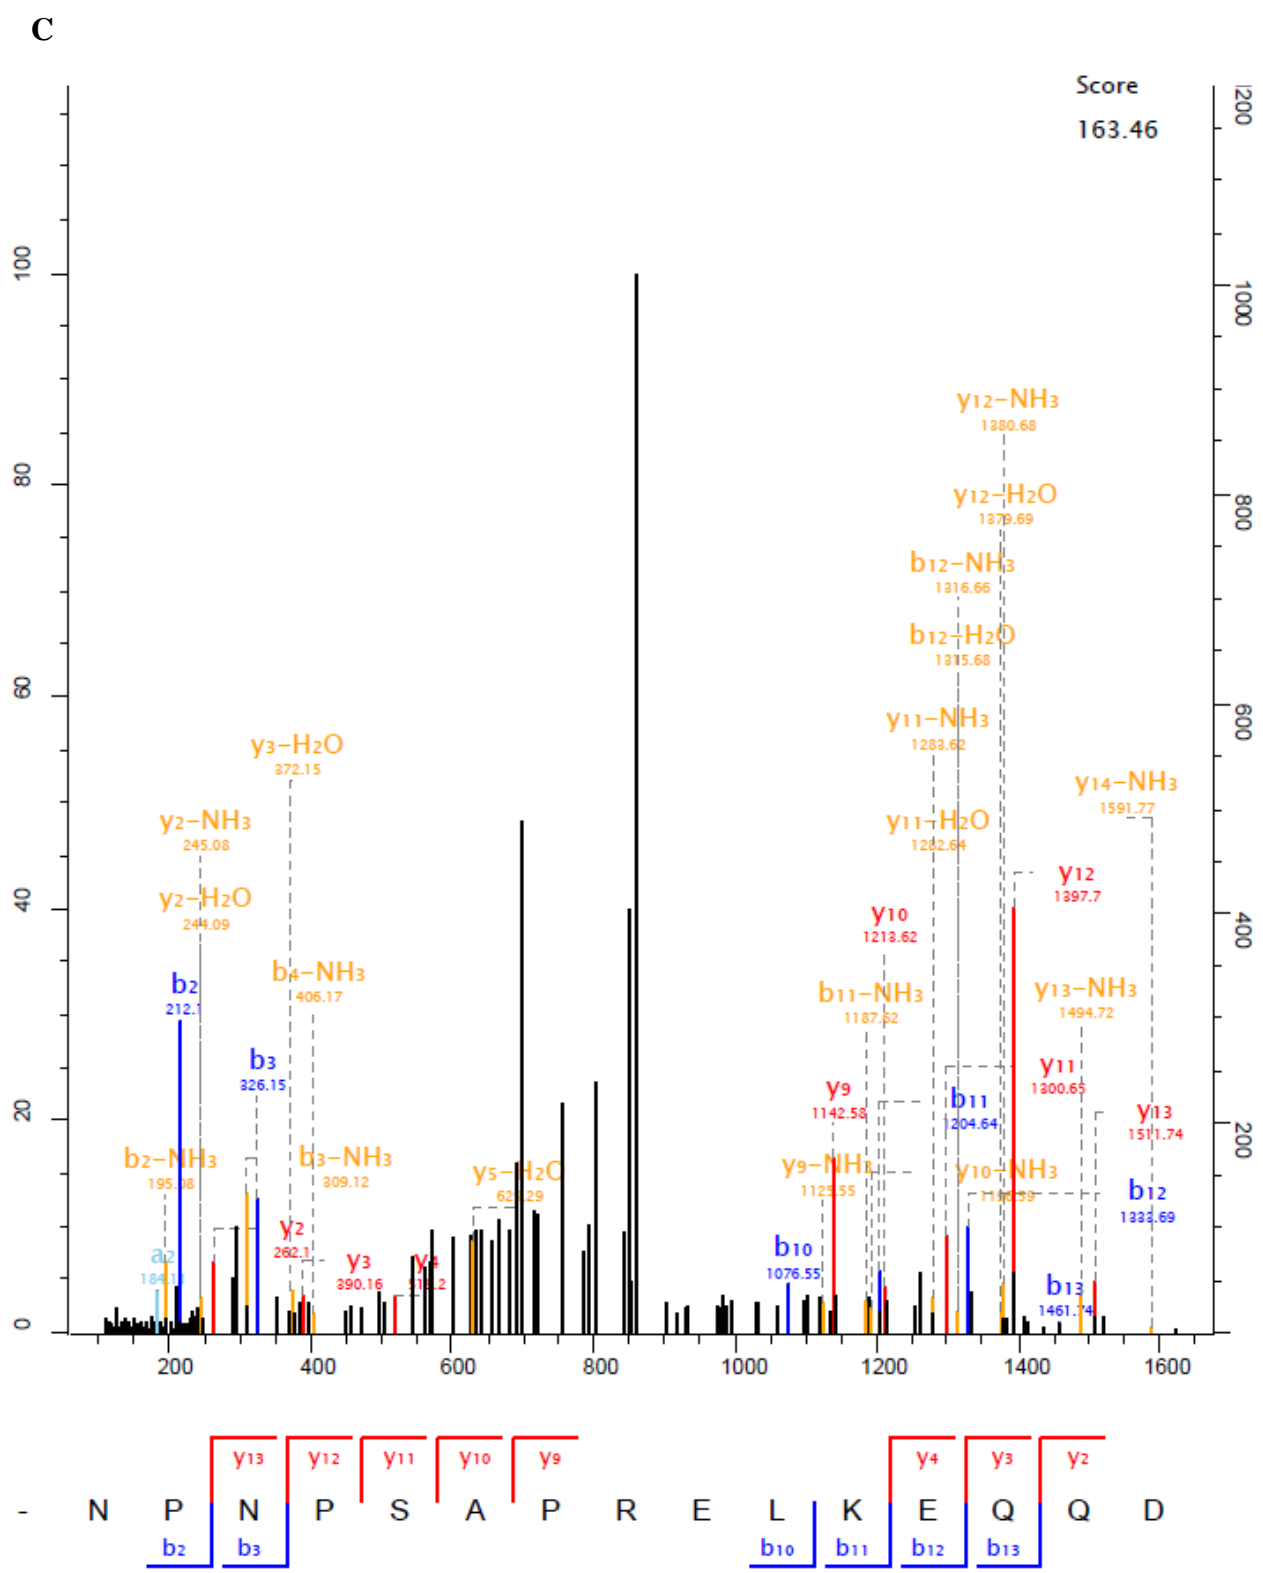

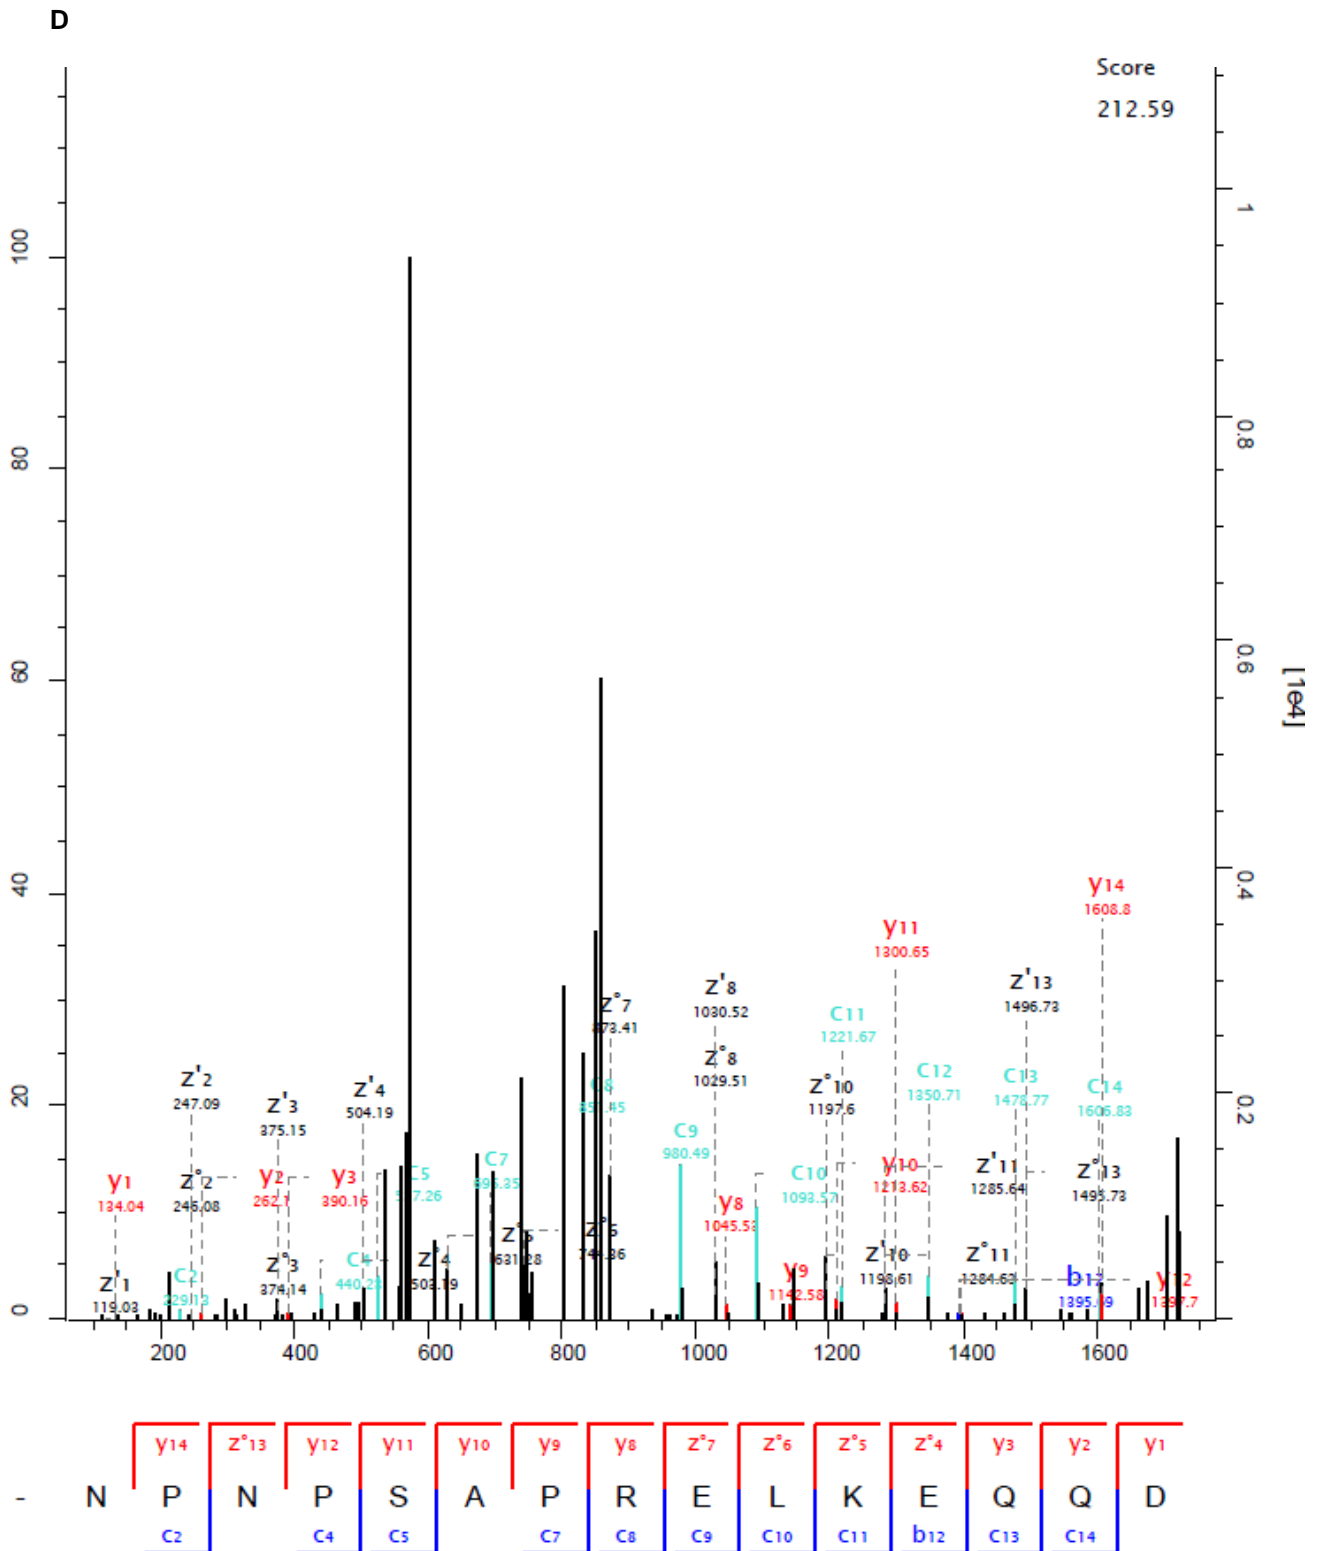

**Fig. S6.** MS/MS fragmentation spectra of the Asn408-Asp422 peptides in an overnight Arg-C digest of NPB- $\alpha$ 2AP as determined by Mascot analysis (A and B) and MaxQuant analysis (C and D). Best spectrum data is shown.
